# Supplementary material for: Crystal structures, dual-state emissions and polymer-based doped room-temperature phosphorescence of 8-benzyloxyisoquinoline derivatives
Source: Royal Society of Chemistry journal article supplement (doi:10.1039/d3ce00231d), 2023-01-01

# Electronic Supplementary Information

## Crystal structures, dual-state emissions and polymer-based doped room-temperature phosphorescence of 8-benzyloxyisoquinoline derivatives

Miaochang Liu,<sup>a</sup> Xinyue Xu,<sup>b</sup> Yating Chen,<sup>b</sup> Qiuping Ding,<sup>\*a</sup> Yunxiang Lei,<sup>b</sup> Huayue Wu,<sup>\*b</sup> and Xiaobo Huang<sup>\*b</sup>

<sup>a</sup> Key Laboratory of Functional Small Organic Molecules, Ministry of Education, Jiangxi Normal University, 99 Ziyang Road, Nanchang 330022, P. R. China

E-mail: dqjxnu@gmail.com (Q. Ding)

<sup>b</sup> College of Chemistry and Materials Engineering, Wenzhou University, Wenzhou 325035, P. R. China

E-mail: huayuewu@wzu.edu.cn (H. Wu), xiaobhuang@wzu.edu.cn (X. Huang)

### Contents:

## 1. Experimental

### 1.1 Measurements and materials

NMR spectra were determined using a Bruker DRX 500 NMR spectrometer using CDCl<sub>3</sub> as a solvent and trimethylsilane as a reference. Melting points were determined on a WRS-1B digital melting point meter and were uncorrected. HRMS-ESI mass spectra were conducted on a Hitachi Nano Frontier LD spectrometer. UV-vis absorption spectra were performed with a UV-3600 Shimadzu spectrophotometer. Emission spectra were performed with a HITACHI F-7000 fluorometer. Absolute emission quantum yields and lifetime decays were performed using a Jobin Yvon Horiba FluoroMax-4 fluorometer. The X-ray powder diffraction (XRD) data were conducted on a Bruker X-ray diffractometer. The X-ray crystallographic analyses were conducted on a Bruker SMART II CCD area detector.

### 1.2 General procedure for 8-benzyloxyisoquinoline derivatives

A mixture of compound **3** (281.4 mg, 1.0 mmol), potassium carbonate (138.2 mg, 1.0 mmol), and 10 mL of acetonitrile was first stirred at 50 °C for 3 h. Various organic bromines (1.5 mmol) was then added to the mixture, which was further stirred at 80 °C for 10 h. After being cooled to room temperature, the reaction mixture was extracted with dichloromethane. The organic phase was dried with anhydrous sodium sulfate and the organic solvent was removed under reduced pressure. The residue was purified by a silica gel column chromatography using ethyl acetate/petroleum ether (1:8, v: v) as the eluent to afford pure 8-benzyloxyisoquinoline derivatives.

**8-(Benzyloxy)-3,6-dimethyl-1-(piperidin-1-yl)isoquinoline-7-carbonitrile (IQ-H).** White solid (316.9 mg), 85.3% yield, m. p. 141.2-141.8 °C. <sup>1</sup>H NMR (CDCl<sub>3</sub>, 500 MHz): 7.52 (d, *J* = 7.0 Hz, 2H), 7.40-7.33 (m, 3H), 7.20 (s, 1H), 6.82 (s, 1H), 5.04 (s, 2H), 3.62 (br, 2H), 3.06 (br, 2H), 2.56 (s, 3H), 2.50 (s, 3H), 1.60-1.43 (m, 6H) ppm. <sup>13</sup>C NMR (CDCl<sub>3</sub>, 125 MHz): δ 161.0, 158.8, 152.8, 143.8, 140.4, 136.0, 128.9, 128.3, 122.5, 116.4, 111.1, 110.6, 104.8, 78.7, 52.4, 25.5, 24.6, 24.2, 20.6 ppm. HRMS (ESI) *m/z*: [M+H]<sup>+</sup> calculated for C<sub>24</sub>H<sub>26</sub>N<sub>3</sub>O, 372.2070; found, 372.2074.

**3,6-Dimethyl-8-((4-methylbenzyl)oxy)-1-(piperidin-1-yl)isoquinoline-7-carbonitrile (IQ-Me).** White solid (337.3 mg), 87.5% yield, m. p. 123.8-123.9 °C. <sup>1</sup>H NMR (CDCl<sub>3</sub>, 500 MHz): 7.39 (d, *J* = 7.0 Hz, 2H), 7.18-7.17 (m, 3H), 6.81 (s, 1H), 5.00 (s, 2H), 3.60 (br, 2H), 3.09 (br, 2H), 2.55 (s, 3H), 2.50 (s, 3H), 2.36 (s, 3H), 1.61-1.26 (m, 6H) ppm. <sup>13</sup>C NMR (CDCl<sub>3</sub>, 125 MHz): 161.1, 158.8, 152.8, 143.8, 140.4, 138.1, 133.0, 129.02, 128.99, 122.4, 116.5, 110.9, 110.6, 104.8, 78.6, 52.3, 25.6, 24.6, 24.2, 21.2, 20.6 ppm. HRMS (ESI) *m/z*: [M+H]<sup>+</sup> calculated for C<sub>25</sub>H<sub>28</sub>N<sub>3</sub>O, 386.2227; found, 386.2231.

**Methyl 4-(((7-cyano-3,6-dimethyl-1-(piperidin-1-yl)isoquinolin-8-yl)oxy) methyl) benzoate (IQ-COOMe).** White solid (348.8 mg), 81.2% yield, m. p. 146.8-147.5 °C. <sup>1</sup>H NMR (CDCl<sub>3</sub>, 500 MHz): 8.06 (d, *J* = 8.5 Hz, 2H), 7.60 (d, *J* = 7.0 Hz, 2H), 7.23 (s, 1H), 6.83 (s, 1H), 5.09 (s, 2H), 3.93 (s, 3H), 3.60 (br, 2H), 3.04 (br, 2H), 2.57 (s, 3H), 2.51 (s, 3H), 1.55 (br, 6H) ppm. <sup>13</sup>C NMR (CDCl<sub>3</sub>, 125 MHz): 166.8, 160.7, 158.8, 153.0, 143.8, 141.2, 140.4, 130.0, 129.7, 128.3, 122.7, 116.3, 111.2, 110.5, 104.7, 77.7, 52.4, 52.0, 25.6, 24.5, 24.2, 20.6 ppm. HRMS (ESI) *m/z*: [M+Na]<sup>+</sup> calculated for C<sub>26</sub>H<sub>27</sub>N<sub>3</sub>O<sub>3</sub>Na, 452.1945; found, 452.1943.

**8-((4-Fluorobenzyl)oxy)-3,6-dimethyl-1-(piperidin-1-yl)isoquinoline-7-carbonitrile (IQ-F).** White solid (297.9 mg), 76.5% yield, m. p. 159.6-159.7 °C. <sup>1</sup>H NMR (CDCl<sub>3</sub>, 500 MHz): 7.49-7.46 (m, 2H), 7.21 (s, 1H), 7.07-7.04 (m, 2H), 6.82 (s, 1H), 5.00 (s, 2H), 3.63 (br, 2H), 3.05 (br, 2H), 2.55 (s, 3H), 2.50 (s, 3H), 1.59 (br, 6H) ppm. <sup>13</sup>C NMR (CDCl<sub>3</sub>, 125 MHz): δ 162.8 (d, *J* = 246.3 Hz), 160.7, 158.8, 153.0, 143.8, 140.4, 131.9 (d, *J* = 3.8 Hz), 130.8 (d, *J* = 7.5 Hz), 122.6, 116.4, 115.2 (d, *J* = 21.3 Hz), 111.1, 110.6, 104.9, 77.8, 52.4, 25.6, 24.6, 24.2, 20.6 ppm. HRMS (ESI) *m/z*: [M+H]<sup>+</sup> calculated for C<sub>24</sub>H<sub>25</sub>FN<sub>3</sub>O, 390.1976; found, 390.1976.

**8-((4-Chlorobenzyl)oxy)-3,6-dimethyl-1-(piperidin-1-yl)isoquinoline-7-carbonitrile (IQ-Cl).** White solid (318.2 mg), 78.4% yield, m. p. 142.8-143.5 °C. <sup>1</sup>H NMR (CDCl<sub>3</sub>, 500 MHz): 7.45 (d, *J* = 7.5 Hz, 2H), 7.35 (d, *J* = 8.0 Hz, 2H), 7.21 (s, 1H), 6.83 (s, 1H), 5.00 (s, 2H), 3.62 (br, 2H), 3.02 (br, 2H), 2.56 (s, 3H), 2.50 (s, 3H), 1.58 (br, 6H) ppm. <sup>13</sup>C NMR (CDCl<sub>3</sub>, 125 MHz): δ 160.7, 158.8, 152.9, 143.7, 140.4, 134.6, 134.2, 130.1, 128.5, 122.7, 116.4, 111.1, 110.5, 104.8, 77.6, 52.4, 25.6, 24.5, 24.2, 20.6 ppm. HRMS (ESI) *m/z*: [M+H]<sup>+</sup> calculated for C<sub>24</sub>H<sub>25</sub>ClN<sub>3</sub>O, 406.1681; found, 406.1683.

**8-((4-Bromobenzyl)oxy)-3,6-dimethyl-1-(piperidin-1-yl)isoquinoline-7-carbonitrile (IQ-Br).** White solid (340.0 mg), 75.5% yield, m. p. 163.0-163.6 °C. <sup>1</sup>H NMR (CDCl<sub>3</sub>, 500 MHz): 7.51 (d, *J* = 8.4 Hz, 2H), 7.40 (d, *J* = 8.0 Hz, 2H), 7.21 (s, 1H), 6.83 (s, 1H), 4.99 (s, 2H), 3.60 (br, 2H), 3.01 (br, 2H), 2.56 (s, 3H), 2.50 (s, 3H), 1.58 (br, 6H) ppm. <sup>13</sup>C NMR (CDCl<sub>3</sub>, 125 MHz): 160.7,

158.8, 153.0, 143.8, 140.4, 135.1, 131.5, 130.4, 122.7, 122.4, 116.4, 111.1, 110.5, 104.8, 77.7, 52.4, 25.6, 24.6, 24.2, 20.6 ppm. HRMS (ESI) m/z: [M+H]<sup>+</sup> calculated for C<sub>24</sub>H<sub>25</sub>BrN<sub>3</sub>O, 450.1176; found, 450.1170.

**8-((4-Cyanobenzyl)oxy)-3,6-dimethyl-1-(piperidin-1-yl)isoquinoline-7-carbonitrile (IQ-CN).** White solid (293.0 mg), 73.9% yield, m. p. 174.3-175.2 °C. <sup>1</sup>H NMR (CDCl<sub>3</sub>, 500 MHz): 7.71-7.66 (m, 4H), 7.25 (s, 1H), 6.86 (s, 1H), 5.09 (s, 2H), 3.62 (br, 2H), 3.00 (br, 2H), 2.57 (s, 3H), 2.51 (s, 3H), 1.65-1.56 (m, 6H) ppm. <sup>13</sup>C NMR (CDCl<sub>3</sub>, 125 MHz): δ 160.4, 158.8, 153.2, 143.8, 141.5, 140.5, 132.3, 128.8, 123.0, 118.6, 116.3, 112.1, 111.4, 110.5, 104.7, 77.1, 52.5, 25.7, 24.5, 24.2, 20.6 ppm. HRMS (ESI) m/z: [M+H]<sup>+</sup> calculated for C<sub>25</sub>H<sub>24</sub>N<sub>4</sub>O, 397.2023; found, 397.2014.

**3,6-Dimethyl-8-((4-nitrobenzyl)oxy)-1-(piperidin-1-yl)isoquinoline-7-carbonitrile (IQ-NO<sub>2</sub>).** Yellow solid (324.8 mg), 78.0% yield, m. p. 208.5-209.4 °C. <sup>1</sup>H NMR (CDCl<sub>3</sub>, 500 MHz): 8.27 (d, *J* = 8.5 Hz, 2H), 7.74 (d, *J* = 9.0 Hz, 2H), 7.26 (s, 1H), 6.87 (s, 1H), 5.15 (s, 2H), 3.62 (br, 2H), 3.01 (br, 2H), 2.58 (s, 3H), 2.51 (s, 3H), 1.55 (br, 6H) ppm. <sup>13</sup>C NMR (CDCl<sub>3</sub>, 125 MHz): 160.3, 158.8, 153.2, 147.8, 143.8, 143.5, 140.5, 128.8, 123.7, 123.1, 116.2, 111.4, 110.5, 104.7, 76.8, 52.5, 25.7, 24.5, 24.2, 20.6 ppm. HRMS (ESI) m/z: [M+H]<sup>+</sup> calculated for C<sub>24</sub>H<sub>25</sub>N<sub>4</sub>O<sub>3</sub>, 417.1921; found, 417.1928.

**8-((3,5-Dimethylbenzyl)oxy)-3,6-dimethyl-1-(piperidin-1-yl)isoquinoline-7-carbonitrile (IQ-DMe).** White solid (364.4 mg), 91.2% yield, m. p. 122.1-123.0 °C. <sup>1</sup>H NMR (CDCl<sub>3</sub>, 500 MHz): 7.19 (s, 1H), 7.12 (s, 2H), 6.97 (s, 1H), 6.80 (s, 1H), 4.96 (s, 2H), 3.60 (br, 2H), 3.09 (br, 2H), 2.56 (s, 3H), 2.49 (s, 3H), 2.32 (s, 6H), 1.61-1.48 (m, 6H) ppm. <sup>13</sup>C NMR (CDCl<sub>3</sub>, 125 MHz): 161.2, 158.8, 152.8, 143.8, 140.4, 137.8, 135.8, 129.9, 126.9, 122.3, 116.5, 110.8, 110.6, 104.8, 78.9, 52.3, 25.5, 24.7, 24.2, 21.2, 20.6 ppm. HRMS (ESI) m/z: [M+H]<sup>+</sup> calculated for C<sub>26</sub>H<sub>30</sub>N<sub>3</sub>O, 400.2383; found, 400.2384.

**8-((3,5-Bis(trifluoromethyl)benzyl)oxy)-3,6-dimethyl-1-(piperidin-1-yl)isoquinoline-7-carbonitrile (IQ-BTF).** White solid (348.6 mg), 68.7% yield, m. p. 104.9-105.7 °C. <sup>1</sup>H NMR (CDCl<sub>3</sub>, 500 MHz): 8.00 (s, 2H), 7.88 (s, 1H), 7.26 (s, 1H), 6.86 (s, 1H), 5.15 (s, 2H), 3.60 (br, 2H), 3.00 (br, 2H), 2.58 (s, 3H), 2.52 (s, 3H), 1.58 (br, 6H) ppm. <sup>13</sup>C NMR (CDCl<sub>3</sub>, 125 MHz): δ 160.0, 158.8, 153.2, 143.8, 140.5, 138.6, 132.1 (q, *J* = 33.8 Hz), 128.7 (d, *J* = 3.75 Hz), 125.4 (q, *J* = 270.0 Hz), 124.3, 123.2, 122.3-122.2 (m), 122.1, 116.2, 111.4, 110.5, 104.9, 76.6, 52.5, 25.7, 24.4, 24.2, 20.6. HRMS (ESI) m/z: [M+H]<sup>+</sup> calculated for C<sub>26</sub>H<sub>24</sub>F<sub>6</sub>N<sub>3</sub>O, 508.1818; found, 508.1816.

### 1.3 Preparation of the doped materials

Dissolve the specific amount of isoquinoline derivative and PMMA in dichloromethane, respectively. The solutions were treated with ultrasound for 10 min in the ultrasonic instrument. The mixture was prepared by drop-wise addition of isoquinoline solution into PMMA solution, and then was treated with ultrasound for 10 min in the ultrasonic instrument for uniform

dissolution. Then the fully mixed two-component solution was slowly poured into the mold. Finally, thin and transparent film was obtained after drying the mixture at 50 °C for 2 h.

## 2. Figures and tables

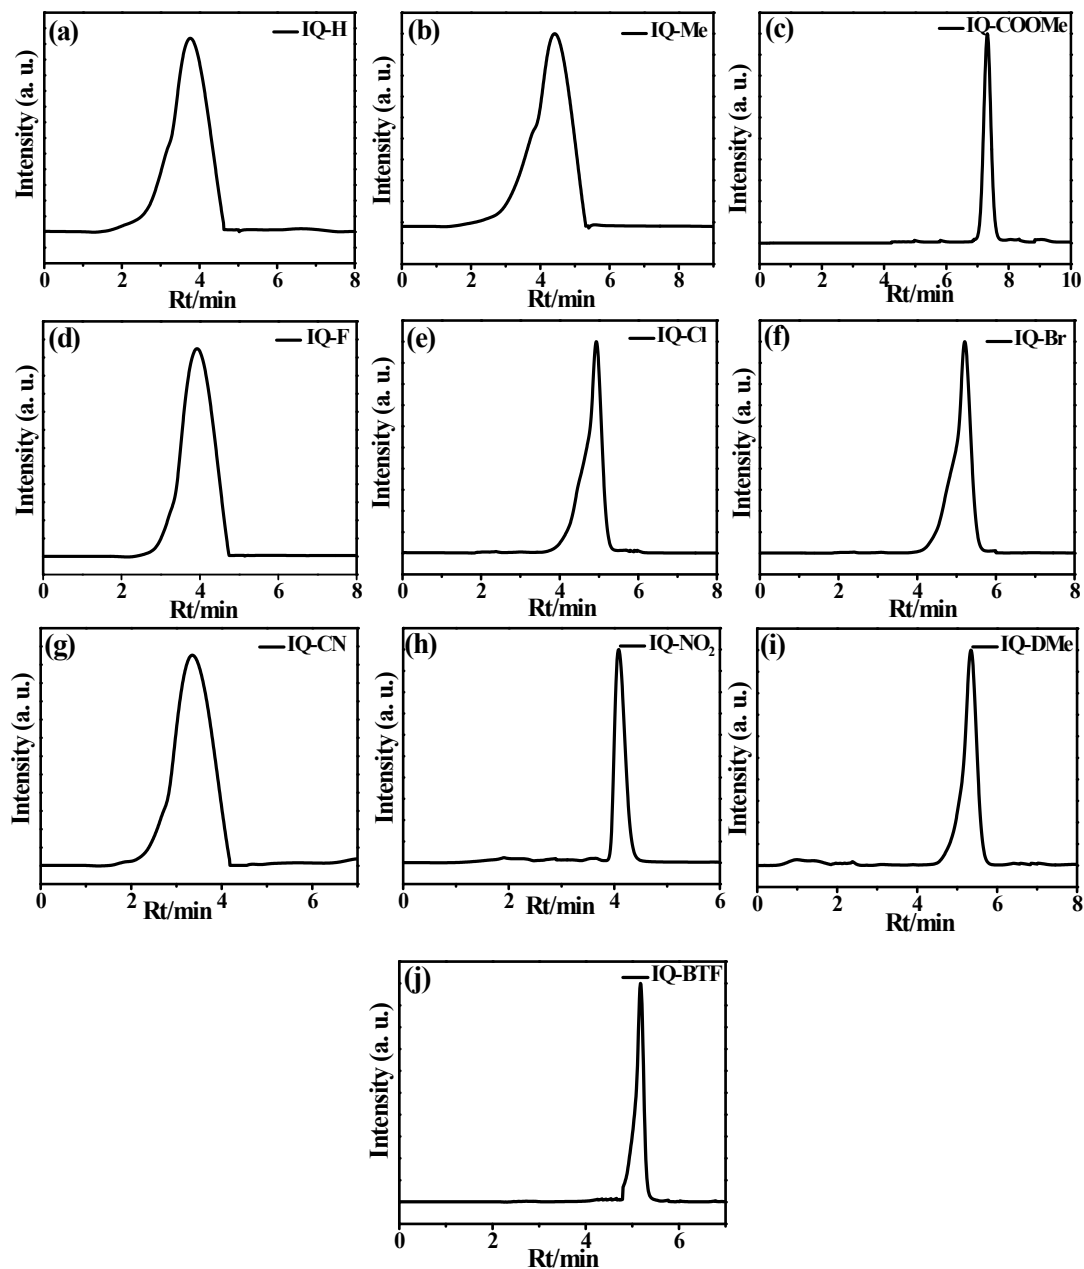

**Fig. S1** High performance liquid chromatography of 8-benzyloxyisoquinoline derivatives. Conditions: CH<sub>3</sub>CN/H<sub>2</sub>O = 60%:40% for (a); CH<sub>3</sub>CN/H<sub>2</sub>O = 80%:20% for (b); CH<sub>3</sub>OH/H<sub>2</sub>O = 60%:40% for (c)-(j).

**Table S1** Fluorescence properties of 8-benzoyloxyisoquinoline derivatives

| compound                 | $\lambda_{\text{abs}}^{\text{max}}$ | $\lambda_{\text{em}}^{\text{max}}$ | $\lambda_{\text{abs}}^{\text{max}}$ | $\lambda_{\text{em}}^{\text{max}}$ | $\Phi_{\text{Fluo.}}$ |
|--------------------------|-------------------------------------|------------------------------------|-------------------------------------|------------------------------------|-----------------------|
|                          | THF, nm                             | THF, nm                            | Solid, nm                           | Solid, nm                          | Solid, %              |
| <b>IQ-H</b>              | 352                                 | 441                                | 417                                 | 455                                | 58.3                  |
| <b>IQ-Me</b>             | 353                                 | 446                                | 401                                 | 443                                | 62.1                  |
| <b>IQ-COOMe</b>          | 351                                 | 407                                | 373                                 | 455                                | 9.6                   |
| <b>IQ-F</b>              | 353                                 | 445                                | 411                                 | 449                                | 57.5                  |
| <b>IQ-Cl</b>             | 353                                 | 436                                | 400                                 | 456                                | 34.2                  |
| <b>IQ-Br</b>             | 354                                 | 437                                | 422                                 | 466                                | 35.3                  |
| <b>IQ-CN</b>             | 351                                 | 407                                | 397                                 | 465                                | 7.6                   |
| <b>IQ-NO<sub>2</sub></b> | 349                                 | 406                                | 403                                 | 495                                | 0.9                   |
| <b>IQ-DMe</b>            | 353                                 | 436                                | 432                                 | 461                                | 48.1                  |
| <b>IQ-BTF</b>            | 351                                 | 406                                | 402                                 | 458                                | 13.6                  |

**Table S2** Crystal data and details of collection and refinement for **IQ-H**, **IQ-Me**, **IQ-COOMe**, **IQ-F**, and **IQ-Cl**

|                                                | <b>IQ-H</b>                                      | <b>IQ-Me</b>                                     | <b>IQ-COOMe</b>                                               | <b>IQ-F</b>                                       | <b>IQ-Cl</b>                                       |
|------------------------------------------------|--------------------------------------------------|--------------------------------------------------|---------------------------------------------------------------|---------------------------------------------------|----------------------------------------------------|
| CCDC (no.)                                     | 2245980                                          | 2245981                                          | 2245985                                                       | 2245982                                           | 2245983                                            |
| Empirical formula                              | C <sub>24</sub> H <sub>25</sub> N <sub>3</sub> O | C <sub>25</sub> H <sub>27</sub> N <sub>3</sub> O | C <sub>26</sub> H <sub>27</sub> N <sub>3</sub> O <sub>3</sub> | C <sub>24</sub> H <sub>24</sub> FN <sub>3</sub> O | C <sub>24</sub> H <sub>24</sub> ClN <sub>3</sub> O |
| Formula weight                                 | 371.47                                           | 385.49                                           | 429.50                                                        | 389.46                                            | 405.91                                             |
| Temperature (K)                                | 293(2)                                           | 293(2)                                           | 293(2)                                                        | 293(2)                                            | 293(2)                                             |
| Crystal system                                 | Monoclinic                                       | Orthorhombic                                     | Triclinic                                                     | Orthorhombic                                      | Monoclinic                                         |
| Space group                                    | <i>P</i> 2 <sub>1</sub>                          | <i>P</i> ccn                                     | <i>P</i> $\bar{1}$                                            | <i>P</i> bca                                      | <i>P</i> 2 <sub>1</sub>                            |
| <i>Z</i>                                       | 2                                                | 8                                                | 4                                                             | 8                                                 | 4                                                  |
| <i>D</i> <sub>calcd</sub> [Mg/m <sup>3</sup> ] | 1.197                                            | 1.071                                            | 1.251                                                         | 1.270                                             | 1.240                                              |
| <i>F</i> (000)                                 | 396                                              | 1648                                             | 912                                                           | 1648                                              | 856                                                |
| $\theta$ range [°]                             | 2.480-25.997                                     | 2.538-25.496                                     | 1.854-26.000                                                  | 2.553-24.993                                      | 2.411-25.499                                       |
| <i>R</i> <sub>1</sub> [I>2 $\sigma$ (I)]       | 0.0346                                           | 0.0641                                           | 0.0479                                                        | 0.0749                                            | 0.0486                                             |
| <i>wR</i> <sub>2</sub> [I>2 $\sigma$ (I)]      | 0.0796                                           | 0.1607                                           | 0.1174                                                        | 0.1566                                            | 0.1063                                             |
| <i>a</i> [Å]                                   | 6.8819(4)                                        | 15.3952(10)                                      | 11.0228(14)                                                   | 19.673(7)                                         | 10.7226(8)                                         |
| <i>b</i> [Å]                                   | 18.2382(10)                                      | 31.5081(17)                                      | 11.0661(13)                                                   | 7.589(2)                                          | 13.7126(11)                                        |
| <i>c</i> [Å]                                   | 8.3735(5)                                        | 9.8531(6)                                        | 19.024(3)                                                     | 27.281(7)                                         | 14.8083(13)                                        |
| $\alpha$ [deg]                                 | 90                                               | 90                                               | 80.438(4)                                                     | 90                                                | 90                                                 |
| $\beta$ [deg]                                  | 101.220(2)                                       | 90                                               | 87.096(4)                                                     | 90                                                | 93.229(3)                                          |
| $\gamma$ [deg]                                 | 90                                               | 90                                               | 85.625(4)                                                     | 90                                                | 90                                                 |
| <i>V</i> [Å <sup>3</sup> ]                     | 1030.90(10)                                      | 4779.5(5)                                        | 2279.9(5)                                                     | 4073(2)                                           | 2173.9(3)                                          |
| GOF                                            | 1.048                                            | 1.030                                            | 1.050                                                         | 1.034                                             | 1.033                                              |
| R(int)                                         | 0.0272                                           | 0.0535                                           | 0.0369                                                        | 0.1441                                            | 0.0273                                             |
| No. of reflcns collected                       | 10712                                            | 21207                                            | 33903                                                         | 16722                                             | 17855                                              |
| No. of unique reflcns                          | 3649                                             | 4433                                             | 8916                                                          | 3565                                              | 7991                                               |
| <i>R</i> <sub>1</sub> (all data)               | 0.0401                                           | 0.1147                                           | 0.0693                                                        | 0.1827                                            | 0.0829                                             |

|                   |        |        |        |        |        |
|-------------------|--------|--------|--------|--------|--------|
| $wR_2$ (all data) | 0.0839 | 0.1887 | 0.1338 | 0.2194 | 0.1262 |
|-------------------|--------|--------|--------|--------|--------|

**Table S3** Crystal data and details of collection and refinement for **IQ-Br**, **IQ-CN**, **IQ-NO<sub>2</sub>**, **IQ-DMe**, and **IQ-BTF**

|                                                | <b>IQ-Br</b>                                       | <b>IQ-CN</b>                                     | <b>IQ-NO<sub>2</sub></b>                                      | <b>IQ-DMe</b>                                    | <b>IQ-BTF</b>                                                   |
|------------------------------------------------|----------------------------------------------------|--------------------------------------------------|---------------------------------------------------------------|--------------------------------------------------|-----------------------------------------------------------------|
| CCDC (no.)                                     | 2245984                                            | 2245986                                          | 2245987                                                       | 2245988                                          | 2245989                                                         |
| Empirical formula                              | C <sub>24</sub> H <sub>24</sub> BrN <sub>3</sub> O | C <sub>25</sub> H <sub>24</sub> N <sub>4</sub> O | C <sub>24</sub> H <sub>24</sub> N <sub>4</sub> O <sub>3</sub> | C <sub>26</sub> H <sub>29</sub> N <sub>3</sub> O | C <sub>26</sub> H <sub>23</sub> F <sub>6</sub> N <sub>3</sub> O |
| Formula weight                                 | 450.37                                             | 396.48                                           | 416.47                                                        | 399.52                                           | 507.47                                                          |
| Temperature (K)                                | 293(2)                                             | 296(2)                                           | 296(2)                                                        | 293(2)                                           | 296(2)                                                          |
| Crystal system                                 | Monoclinic                                         | Triclinic                                        | Monoclinic                                                    | Triclinic                                        | Triclinic                                                       |
| Space group                                    | <i>C</i> 2/ <i>c</i>                               | <i>P</i> $\bar{1}$                               | <i>P</i> 2 <sub>1</sub>                                       | <i>P</i> $\bar{1}$                               | <i>P</i> $\bar{1}$                                              |
| <i>Z</i>                                       | 8                                                  | 2                                                | 4                                                             | 2                                                | 4                                                               |
| <i>D</i> <sub>calcd</sub> [Mg/m <sup>3</sup> ] | 1.391                                              | 1.250                                            | 1.276                                                         | 1.176                                            | 1.344                                                           |
| <i>F</i> (000)                                 | 1856                                               | 420                                              | 880                                                           | 428                                              | 1048                                                            |
| $\theta$ range [°]                             | 2.336-25.500                                       | 2.897-25.499                                     | 2.349-25.500                                                  | 1.881-25.498                                     | 2.449-25.500                                                    |
| <i>R</i> <sub>1</sub> [I>2 $\sigma$ (I)]       | 0.0503                                             | 0.0577                                           | 0.0487                                                        | 0.0566                                           | 0.0499                                                          |
| <i>wR</i> <sub>2</sub> [I>2 $\sigma$ (I)]      | 0.1295                                             | 0.1540                                           | 0.1011                                                        | 0.1564                                           | 0.1192                                                          |
| <i>a</i> [Å]                                   | 21.3712(7)                                         | 7.8031(3)                                        | 10.7300(9)                                                    | 10.8627(3)                                       | 9.4961(3)                                                       |
| <i>b</i> [Å]                                   | 10.6818(3)                                         | 10.8097(4)                                       | 13.6341(10)                                                   | 10.9176(3)                                       | 16.3124(5)                                                      |
| <i>c</i> [Å]                                   | 19.0014(6)                                         | 13.6803(5)                                       | 14.8150(14)                                                   | 10.9887(4)                                       | 17.0312(6)                                                      |
| $\alpha$ [deg]                                 | 90                                                 | 104.0820(10)                                     | 90                                                            | 80.5480(10)                                      | 75.8520(10)                                                     |
| $\beta$ [deg]                                  | 97.4240(10)                                        | 92.9470(10)                                      | 90.254(3)                                                     | 87.9690(10)                                      | 84.4340(10)                                                     |
| $\gamma$ [deg]                                 | 90                                                 | 108.1090(10)                                     | 90                                                            | 61.5120(10)                                      | 78.9830(10)                                                     |
| <i>V</i> [Å <sup>3</sup> ]                     | 4301.3(2)                                          | 1053.66(7)                                       | 2167.3(3)                                                     | 1128.47(6)                                       | 2507.53(14)                                                     |
| GOF                                            | 1.042                                              | 1.061                                            | 1.071                                                         | 1.048                                            | 1.032                                                           |
| R(int)                                         | 0.0365                                             | 0.0710                                           | 0.0199                                                        | 0.0246                                           | 0.0513                                                          |
| No. of reflcns collected                       | 20532                                              | 14730                                            | 10438                                                         | 11024                                            | 36842                                                           |
| No. of unique reflcns                          | 3993                                               | 3919                                             | 7518                                                          | 4161                                             | 9300                                                            |
| <i>R</i> <sub>1</sub> (all data)               | 0.0826                                             | 0.0743                                           | 0.0792                                                        | 0.0733                                           | 0.0811                                                          |
| <i>wR</i> <sub>2</sub> (all data)              | 0.1504                                             | 0.1689                                           | 0.1224                                                        | 0.1747                                           | 0.1418                                                          |

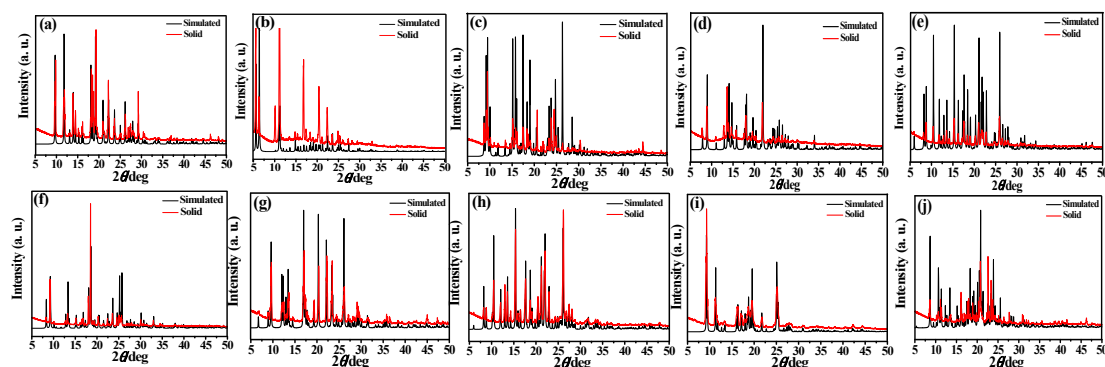

**Fig. S2** Comparison of experimental XRD curves and the simulated XRD curves obtained from the corresponding single crystals: (a) **IQ-H**; (b) **IQ-Me**; (c) **IQ-COOMe**; (d) **IQ-F**; (e) **IQ-Cl**; (f) **IQ-Br**; (g) **IQ-CN**; (h) **IQ-NO<sub>2</sub>**; (i) **IQ-DMe**; (j) **IQ-BTF**.

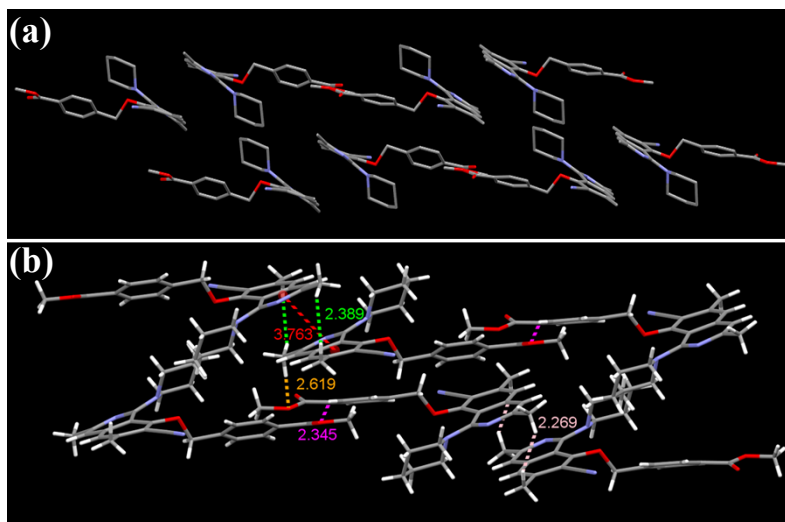

**Fig. S3** Stacking arrangement (a) and intermolecular interactions (b) in crystal IQ-COOMe.

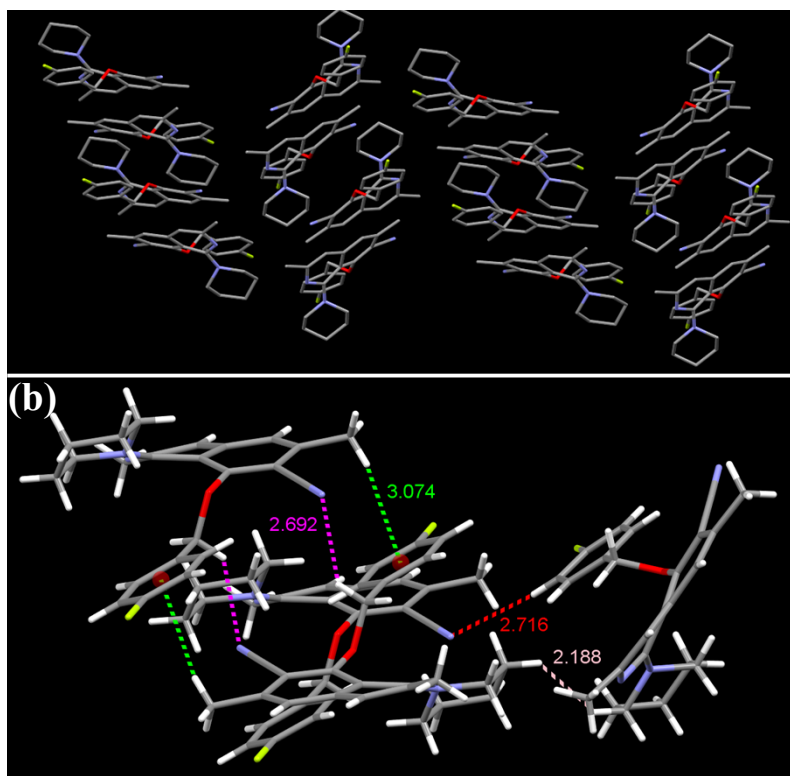

**Fig. S4** Stacking arrangement (a) and intermolecular interactions (b) in crystal IQ-F.

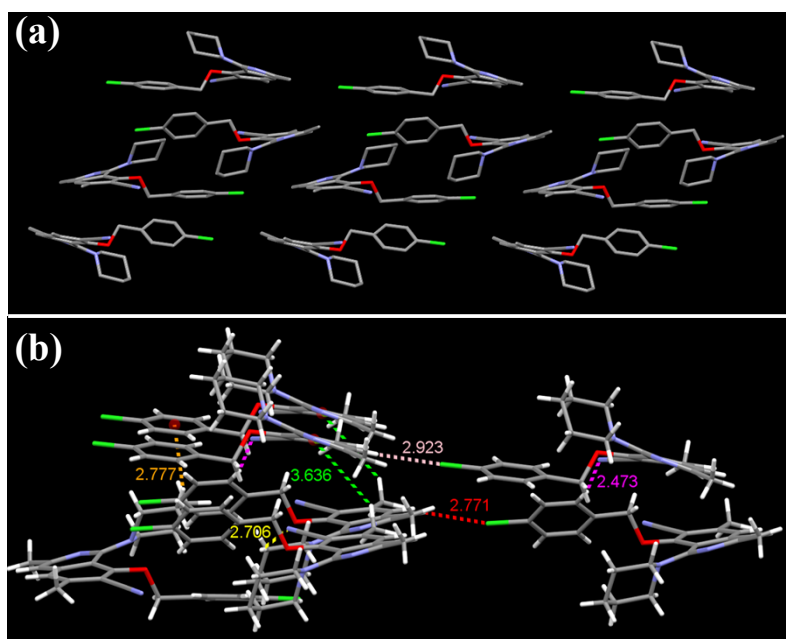

**Fig. S5** Stacking arrangement (a) and intermolecular interactions (b) in crystal **IQ-Cl**.

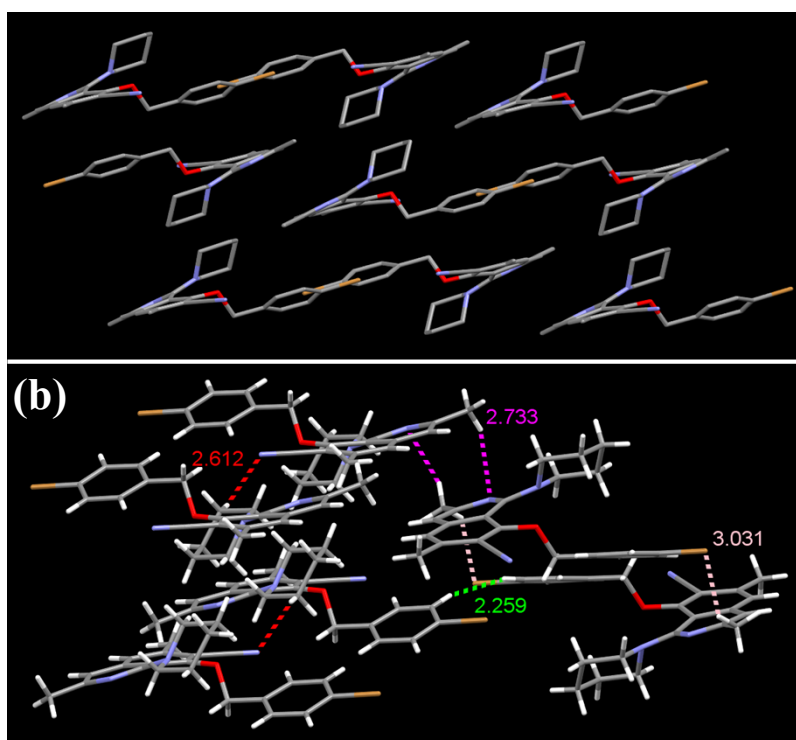

**Fig. S6** Stacking arrangement (a) and intermolecular interactions (b) in crystal **IQ-Br**.



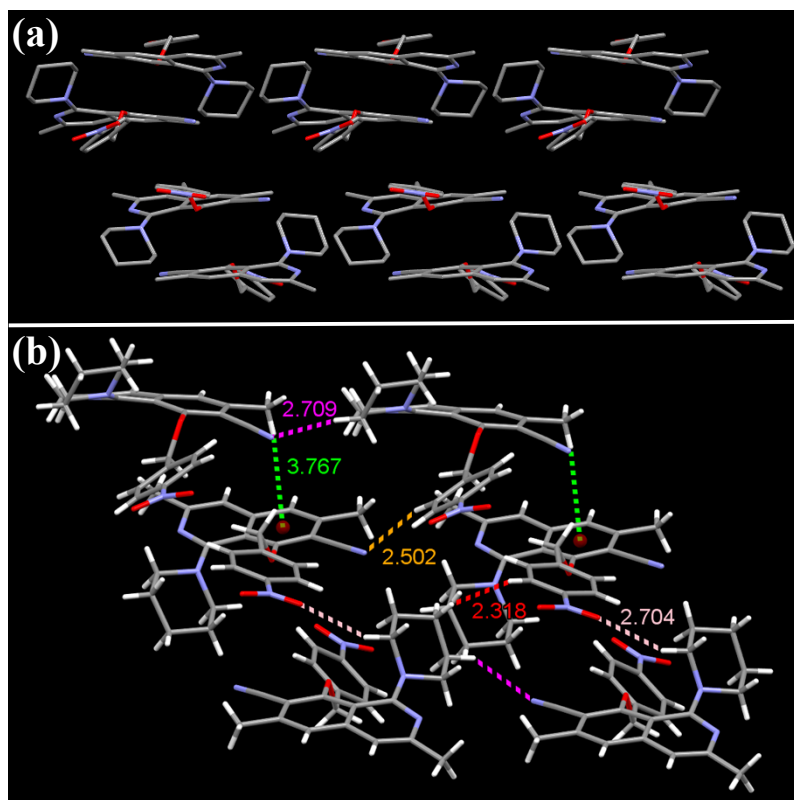

Fig. S7 Stacking arrangement (a) and intermolecular interactions (b) in crystal IQ-NO<sub>2</sub>.

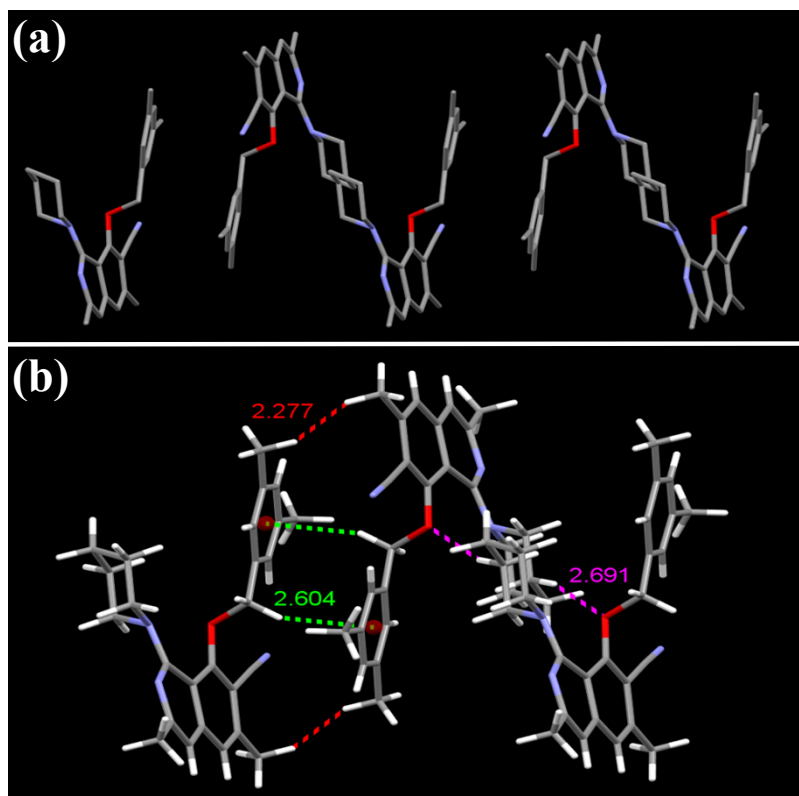

Fig. S8 Stacking arrangement (a) and intermolecular interactions (b) in crystal IQ-DMe.

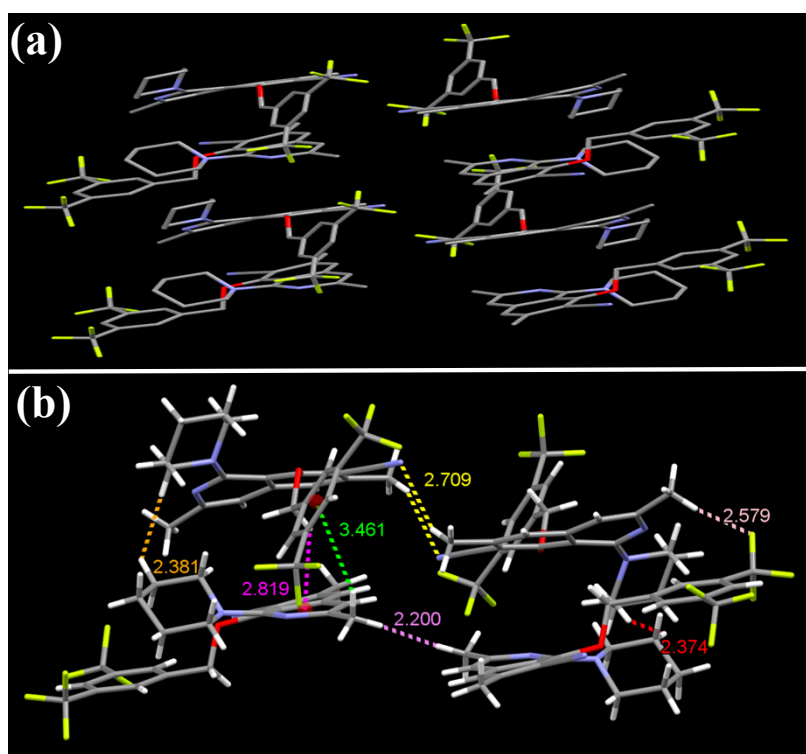

Fig. S9 Stacking arrangement (a) and intermolecular interactions (b) in crystal IQ-BTF.

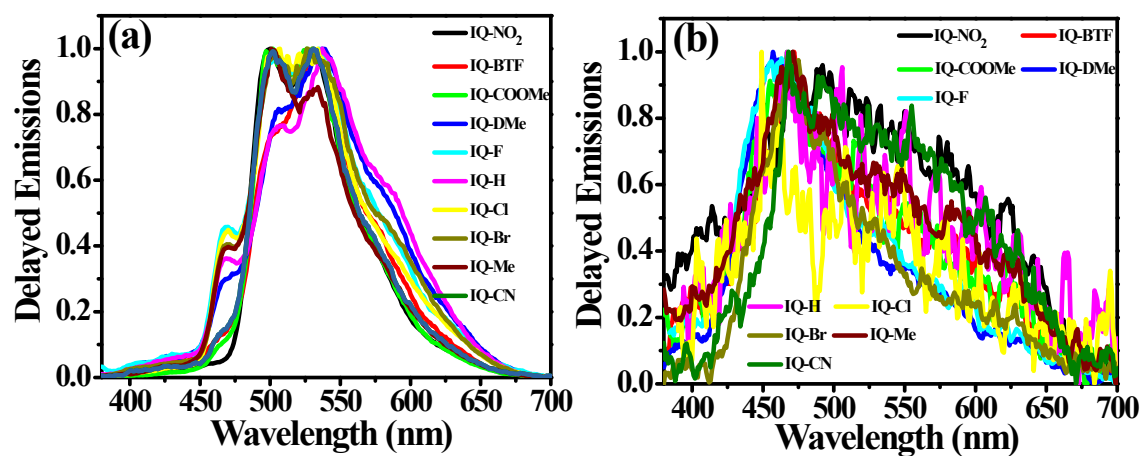

Fig. S10 (a) Delayed emission spectra of 8-benzoyloxyisoquinoline derivatives in THF solvent ( $1 \times 10^{-5}$  mol/L) at 77 K ( $\lambda_{\text{ex}}$ : 400 nm). (b) Delayed emission spectra of 8-benzoyloxyisoquinoline derivatives in solid state at room temperature. Delay time: 0.5 ms.

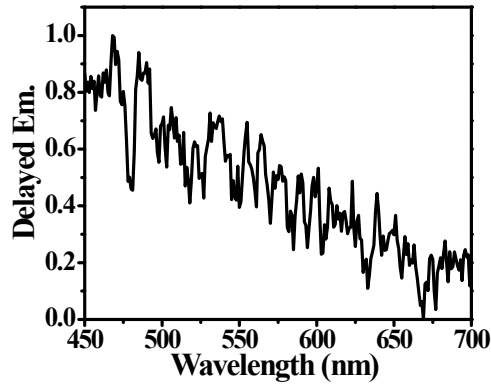

**Fig. S11** Delayed spectrum of the PMMA polymer in solid state at room temperature (Delay time: 0.5 ms).

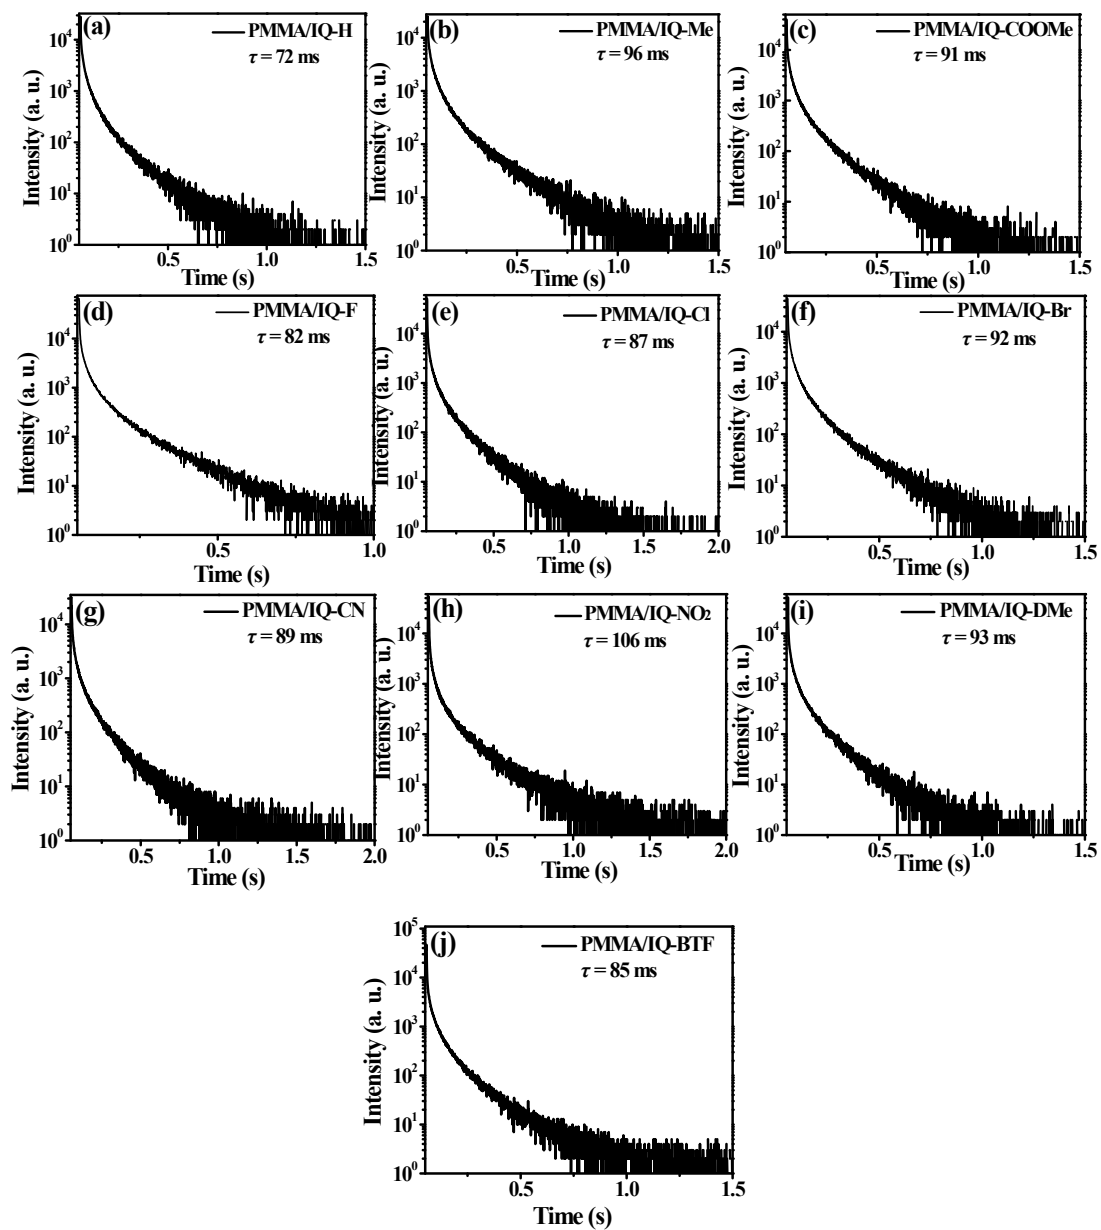

**Fig. S12** Delayed emission lifetimes of the polymer-based doped materials.

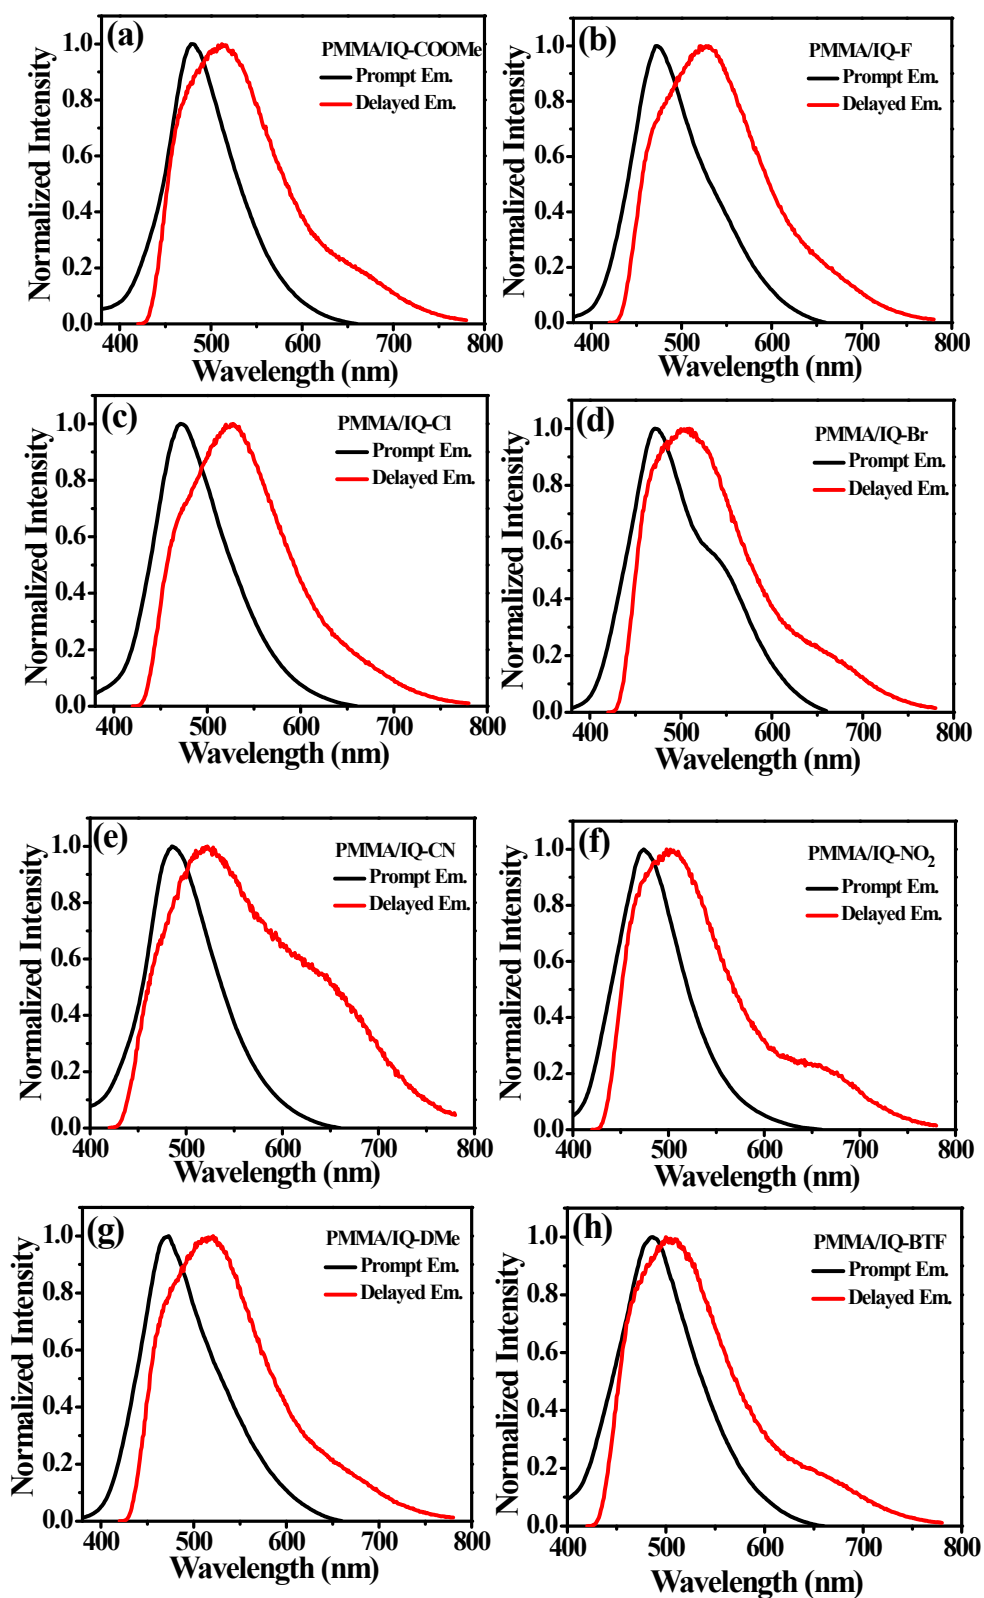

Fig. S13 Prompt and delayed spectra of the other two-component doped materials ( $\lambda_{\text{ex}} = 340$  nm for prompt spectra and  $\lambda_{\text{ex}} = 400$  nm for delayed spectra). Delay time: 0.5 ms.

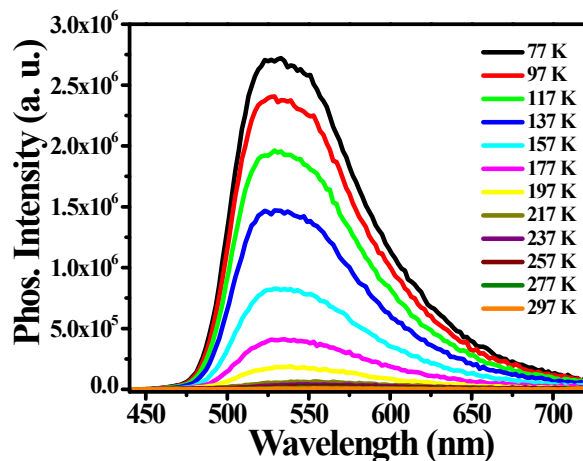

**Fig. S14** Temperature-dependent delayed emissions of PMMA/IQ-DMe ( $\lambda_{\text{ex}} = 400$  nm). Delay time: 0.5 ms.

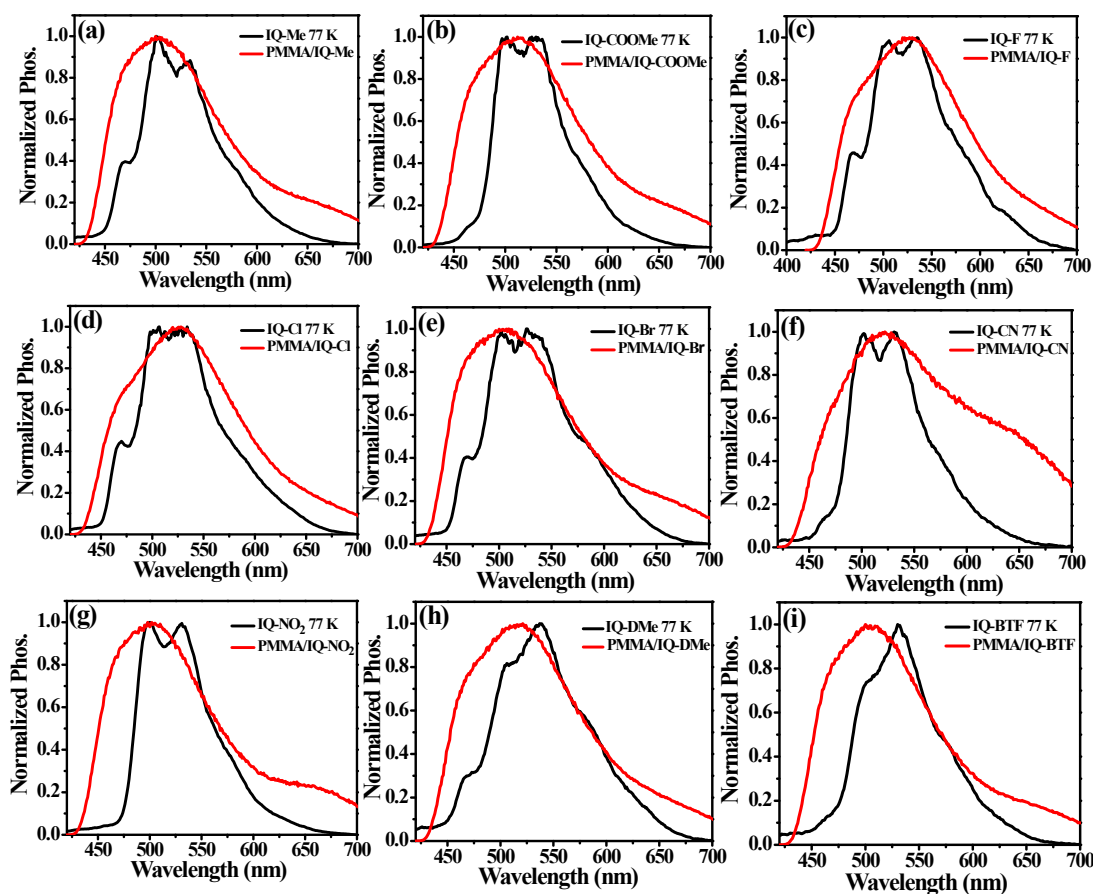

**Fig. S15** Comparison of phosphorescence spectra between 8-benzyloxyisoquinoline derivatives at 77 K in THF solution ( $1 \times 10^{-5}$  mol/L) and the corresponding two-component doped materials ( $\lambda_{\text{ex}} = 400$  nm). Delay time: 0.5 ms.

### 3. Spectra of NMR

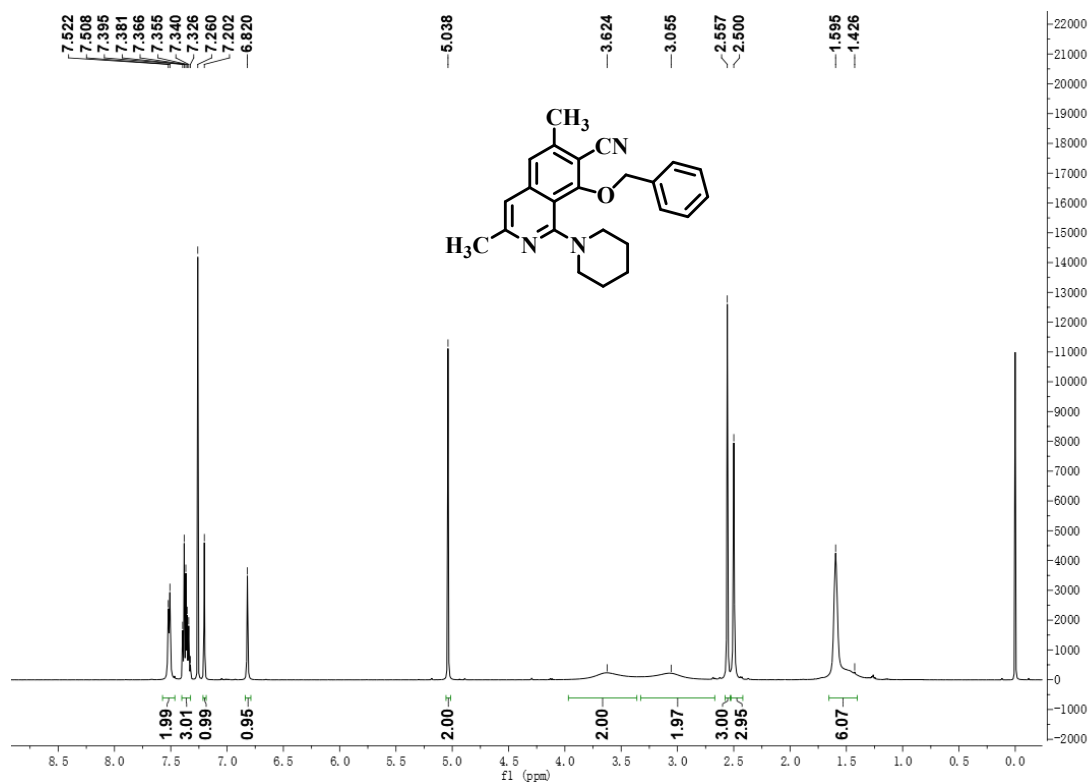

Fig. S16 <sup>1</sup>H NMR of IQ-H (CDCl<sub>3</sub>, 500 MHz).

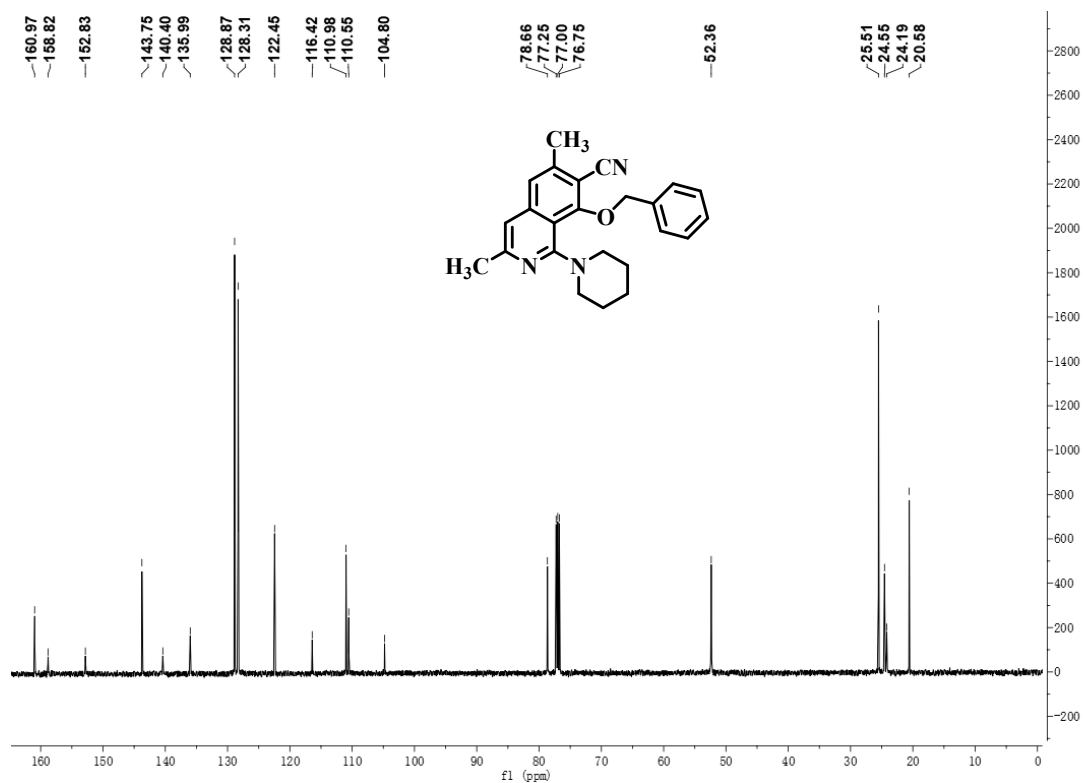

Fig. S17 <sup>13</sup>C NMR of IQ-H (CDCl<sub>3</sub>, 125 MHz).

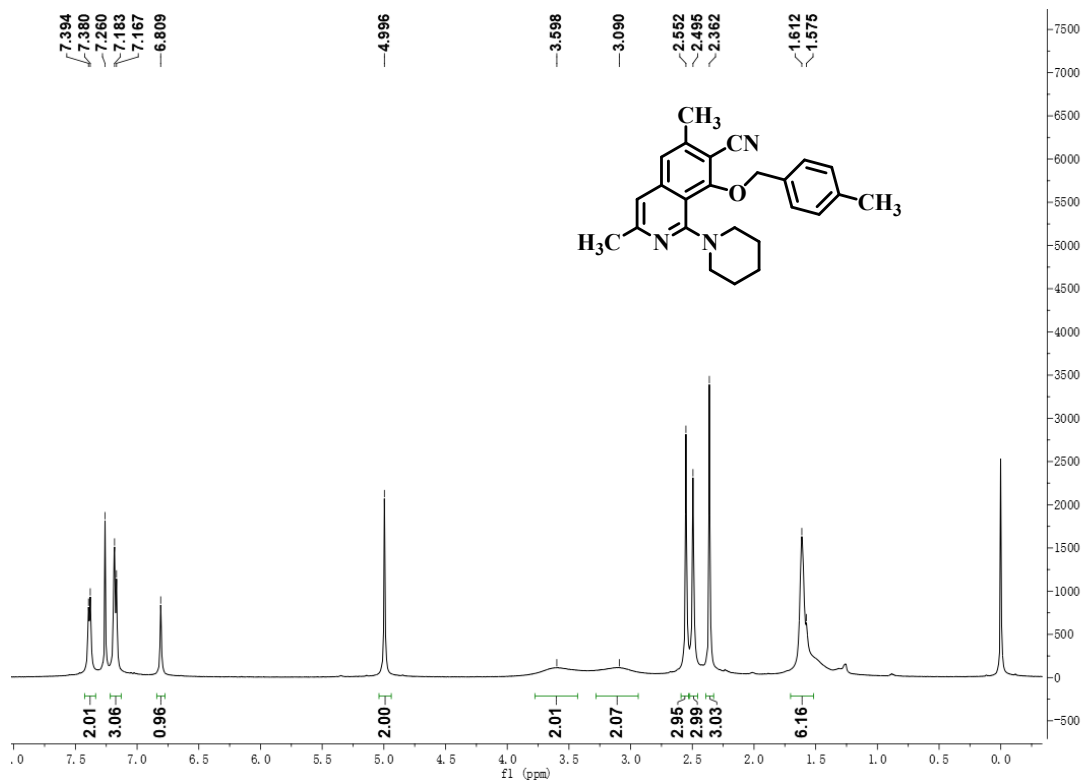

Fig. S18  $^1\text{H}$  NMR of IQ-Me ( $\text{CDCl}_3$ , 500 MHz).

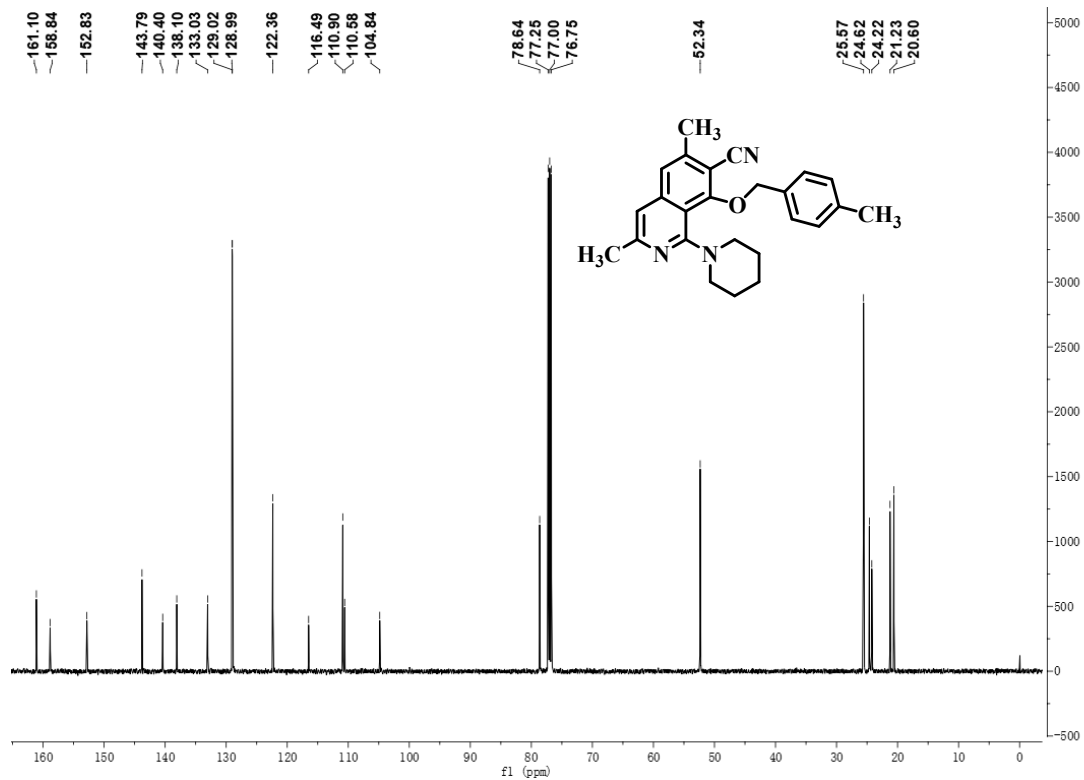

Fig. S19  $^{13}\text{C}$  NMR of IQ-Me ( $\text{CDCl}_3$ , 125 MHz).

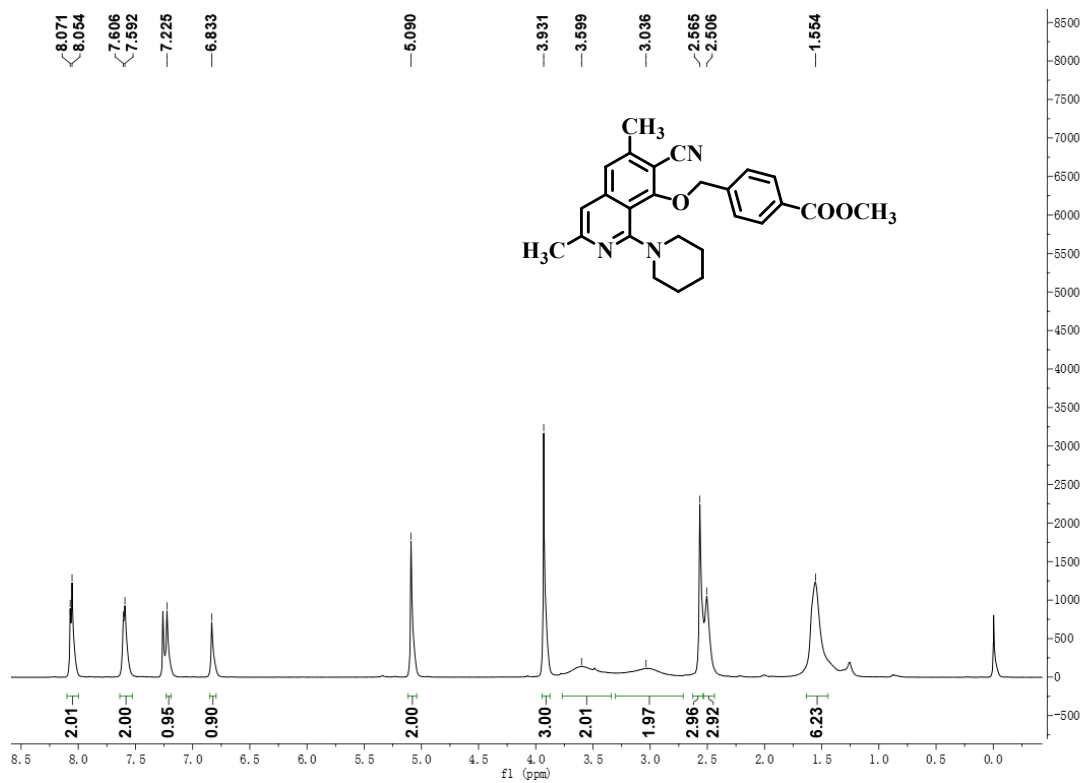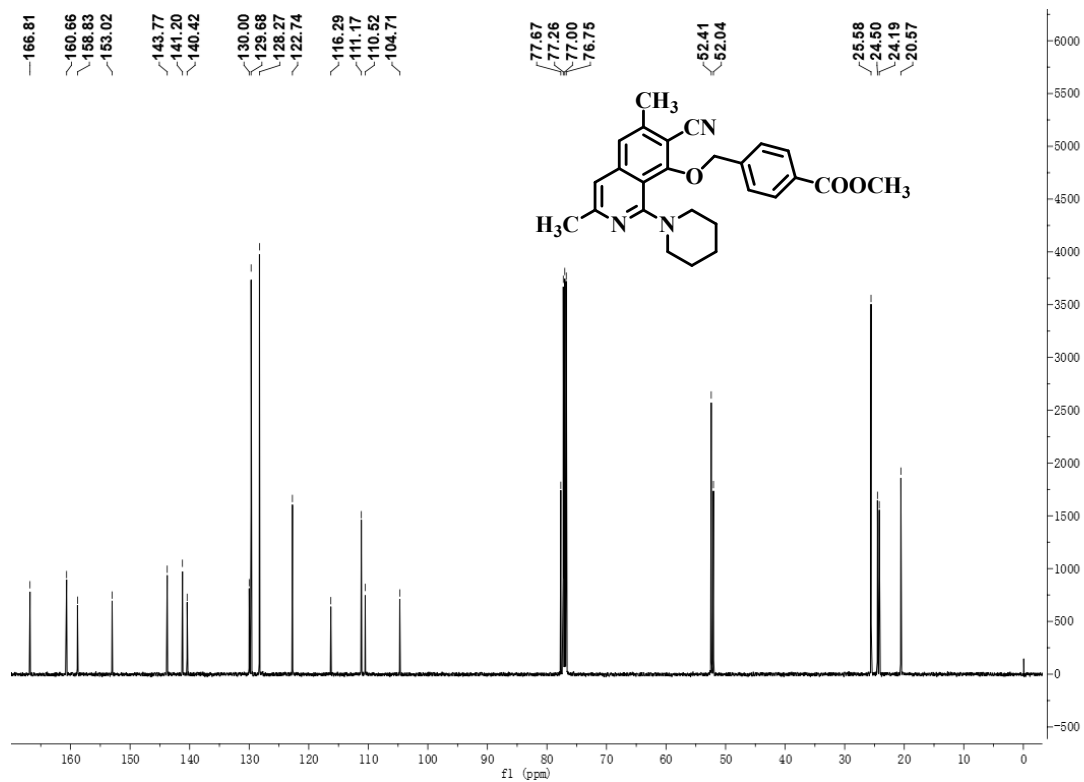



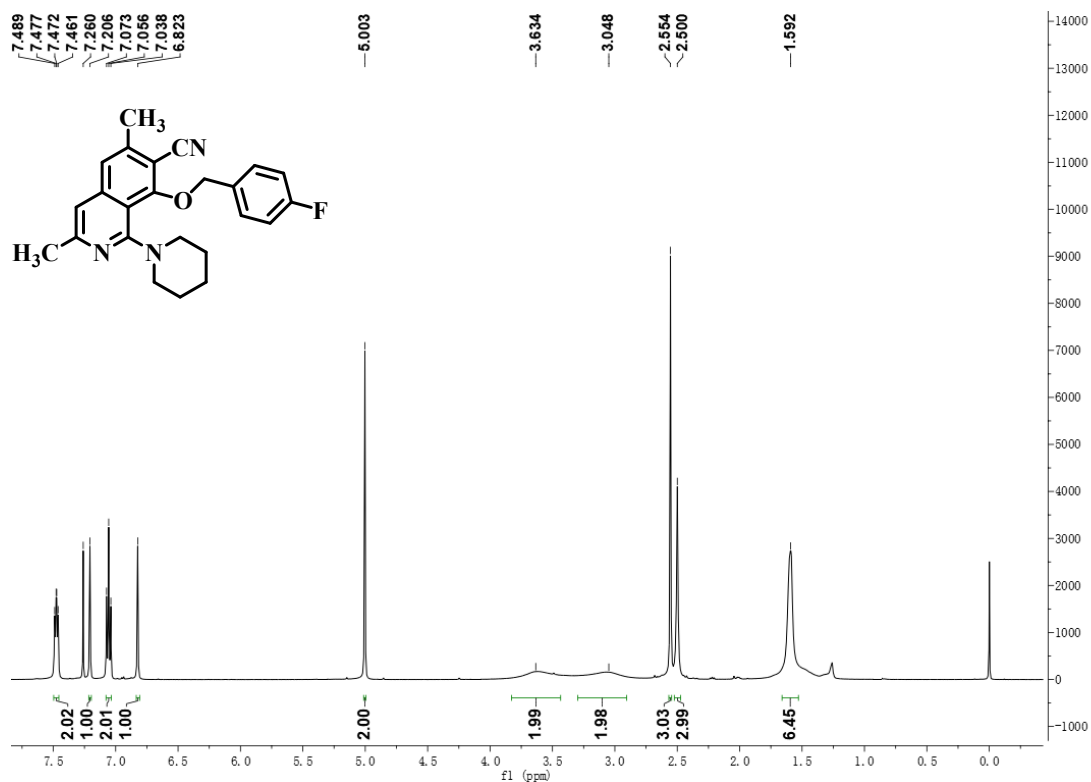

Fig. S22 <sup>1</sup>H NMR of IQ-F (CDCl<sub>3</sub>, 500 MHz).

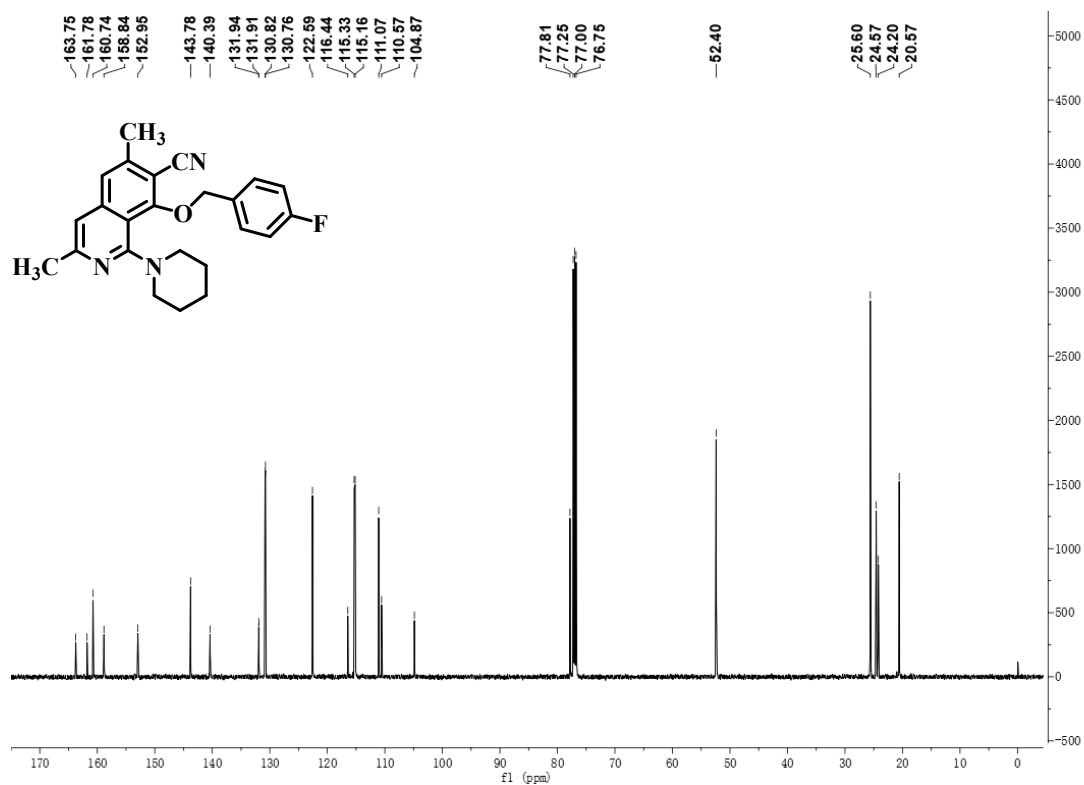

Fig. S23 <sup>13</sup>C NMR of IQ-F (CDCl<sub>3</sub>, 125 MHz).

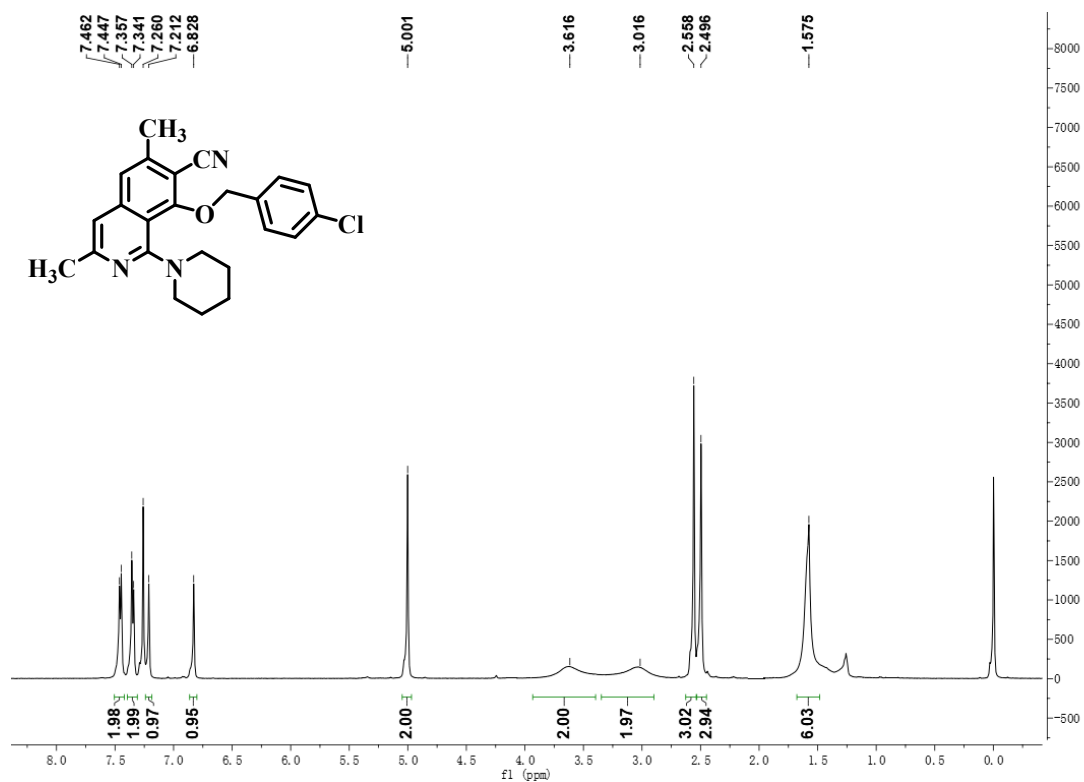

Fig. S24 <sup>1</sup>H NMR of IQ-Cl (CDCl<sub>3</sub>, 500 MHz).

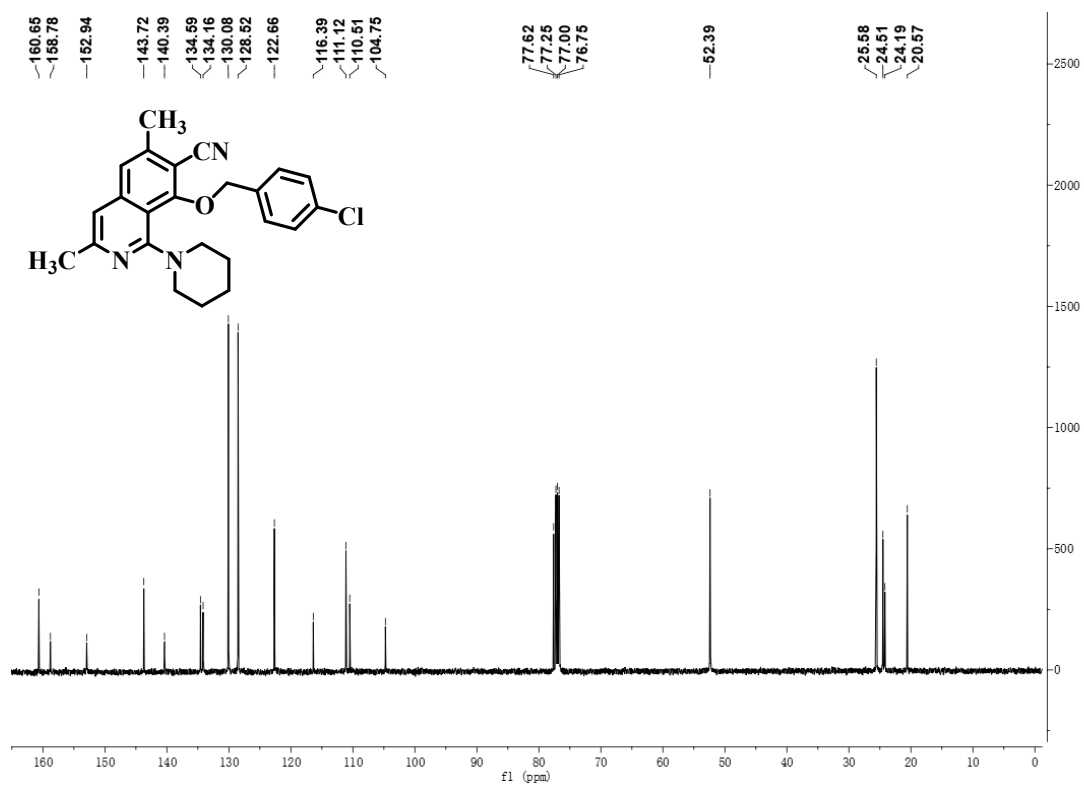

Fig. S25 <sup>13</sup>C NMR of IQ-Cl (CDCl<sub>3</sub>, 125 MHz).

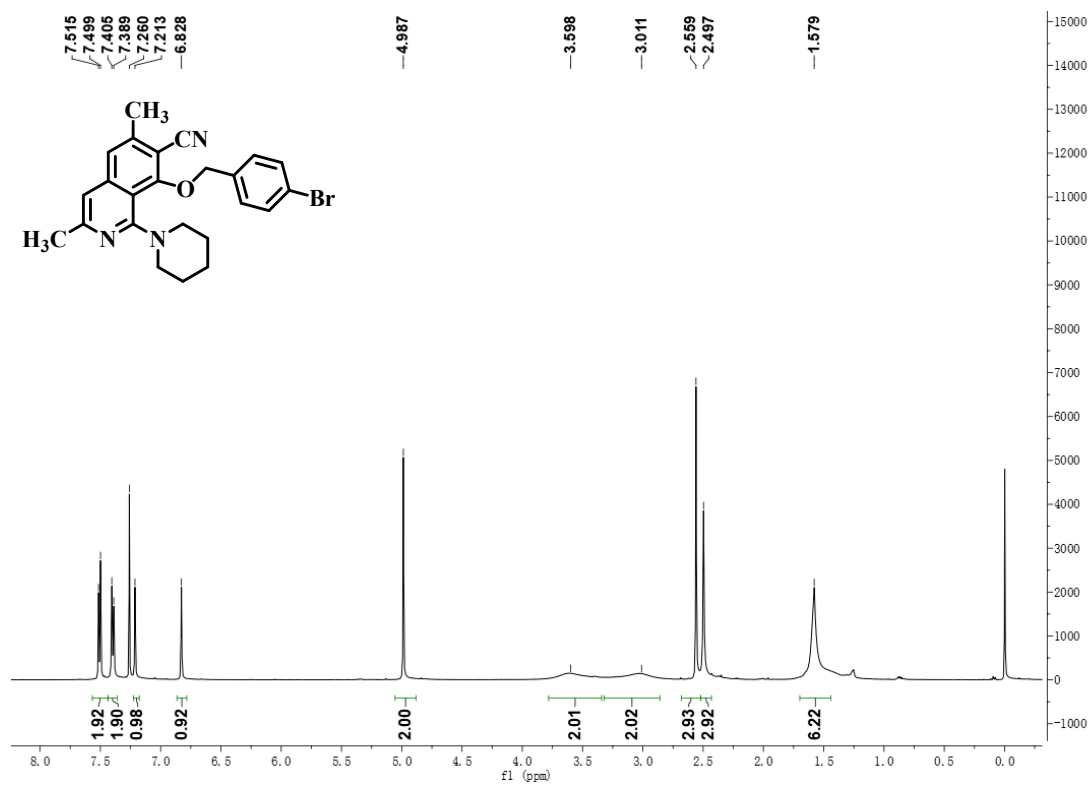

Fig. S26 <sup>1</sup>H NMR of IQ-Br (CDCl<sub>3</sub>, 500 MHz).

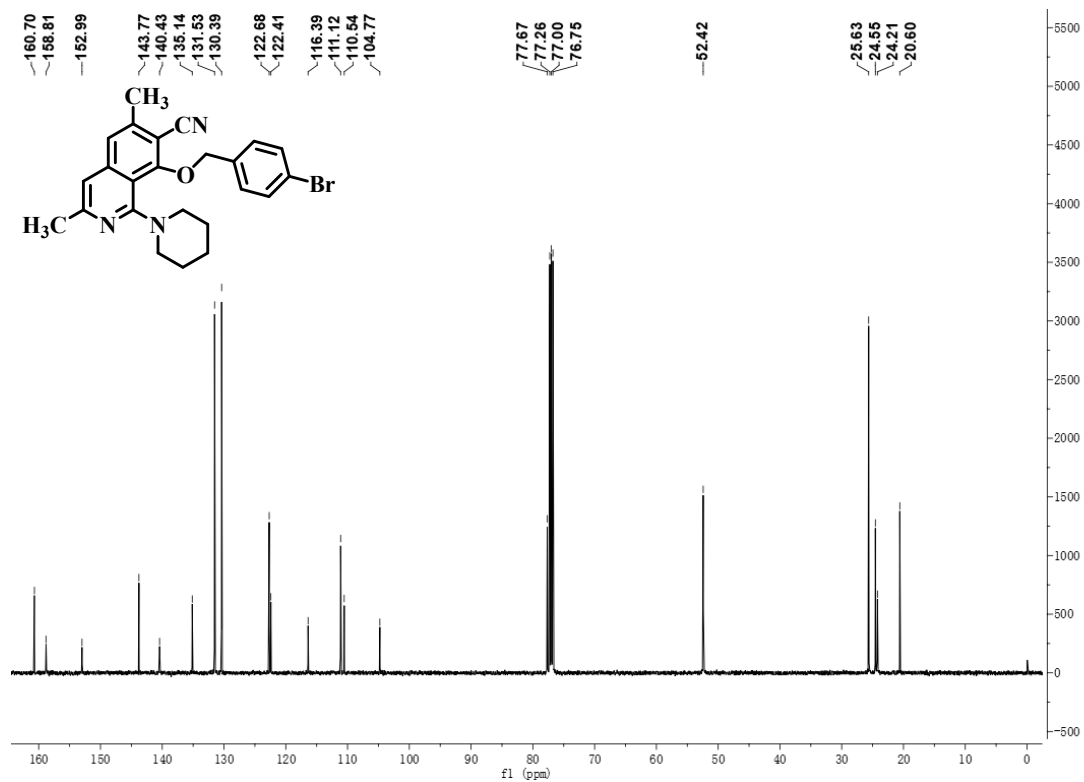

Fig. S27 <sup>13</sup>C NMR of IQ-Br (CDCl<sub>3</sub>, 125 MHz).

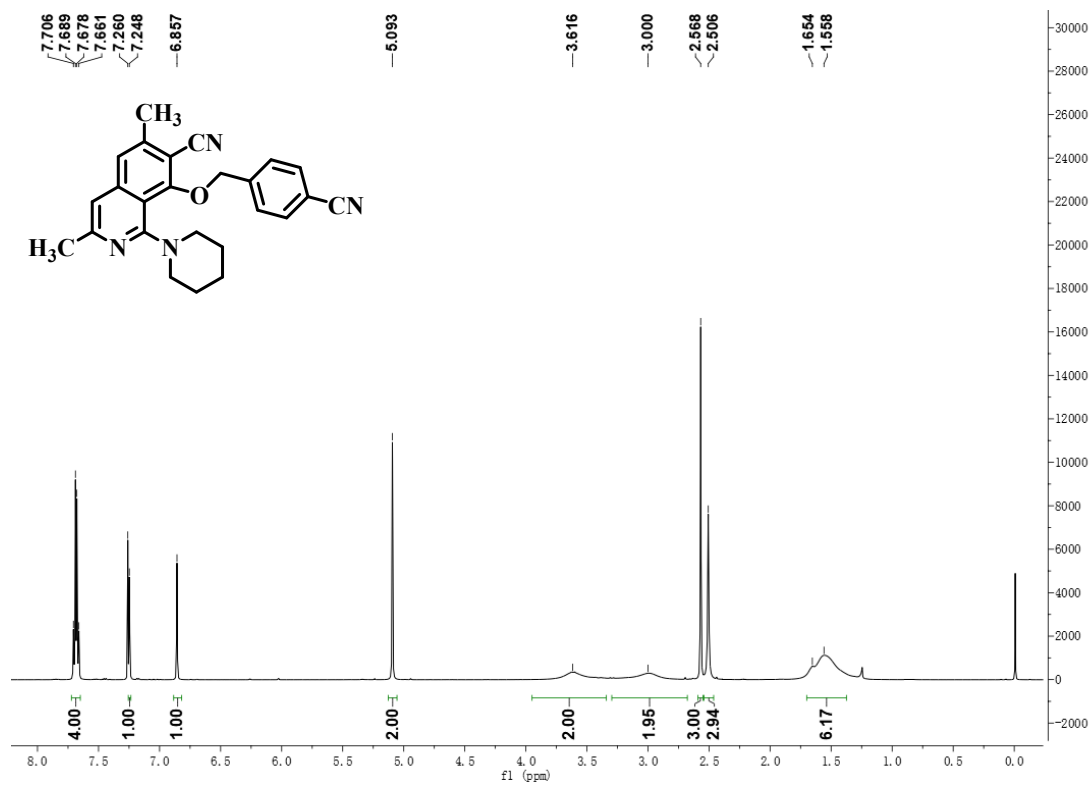

Fig. S28 <sup>1</sup>H NMR of IQ-CN (CDCl<sub>3</sub>, 500 MHz).

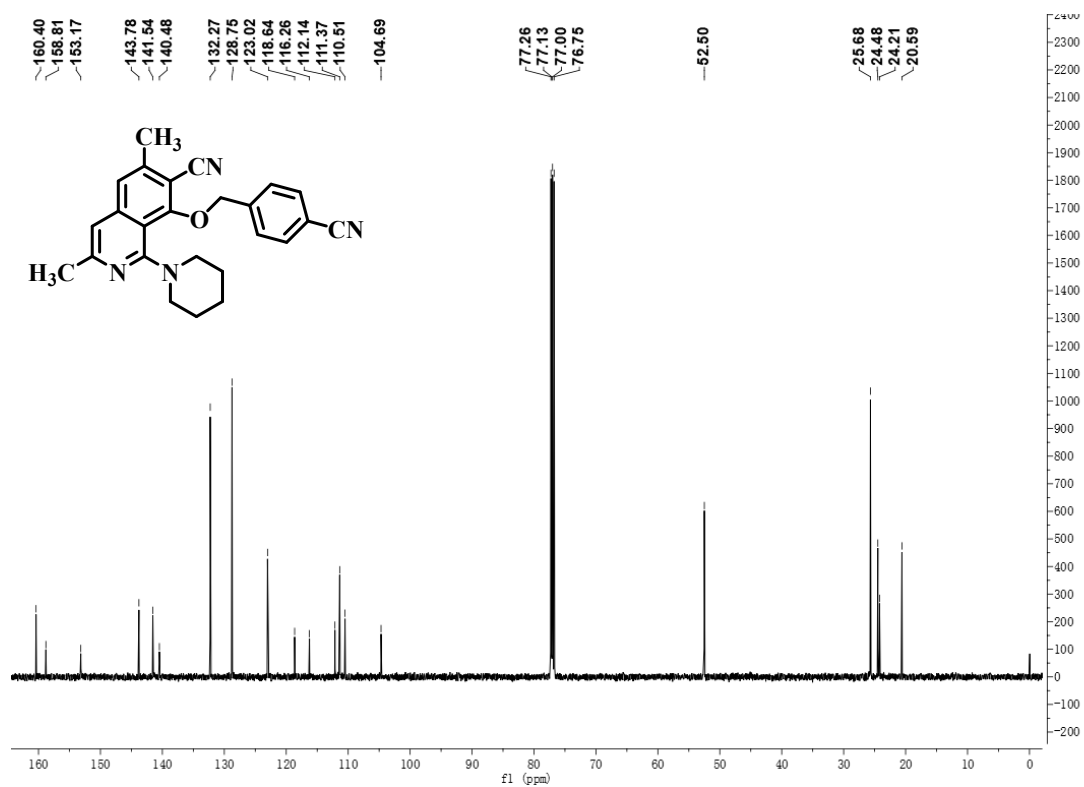

Fig. S29 <sup>13</sup>C NMR of IQ-CN (CDCl<sub>3</sub>, 125 MHz).

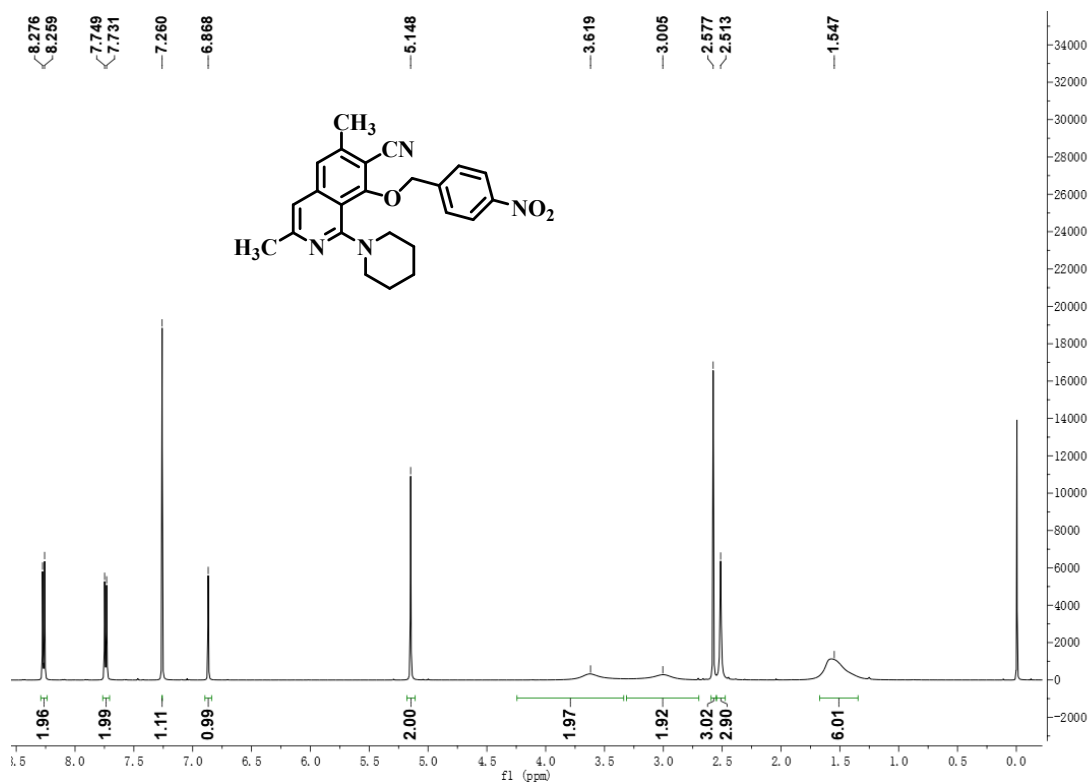

Fig. S30 <sup>1</sup>H NMR of IQ-NO<sub>2</sub> (CDCl<sub>3</sub>, 500 MHz).

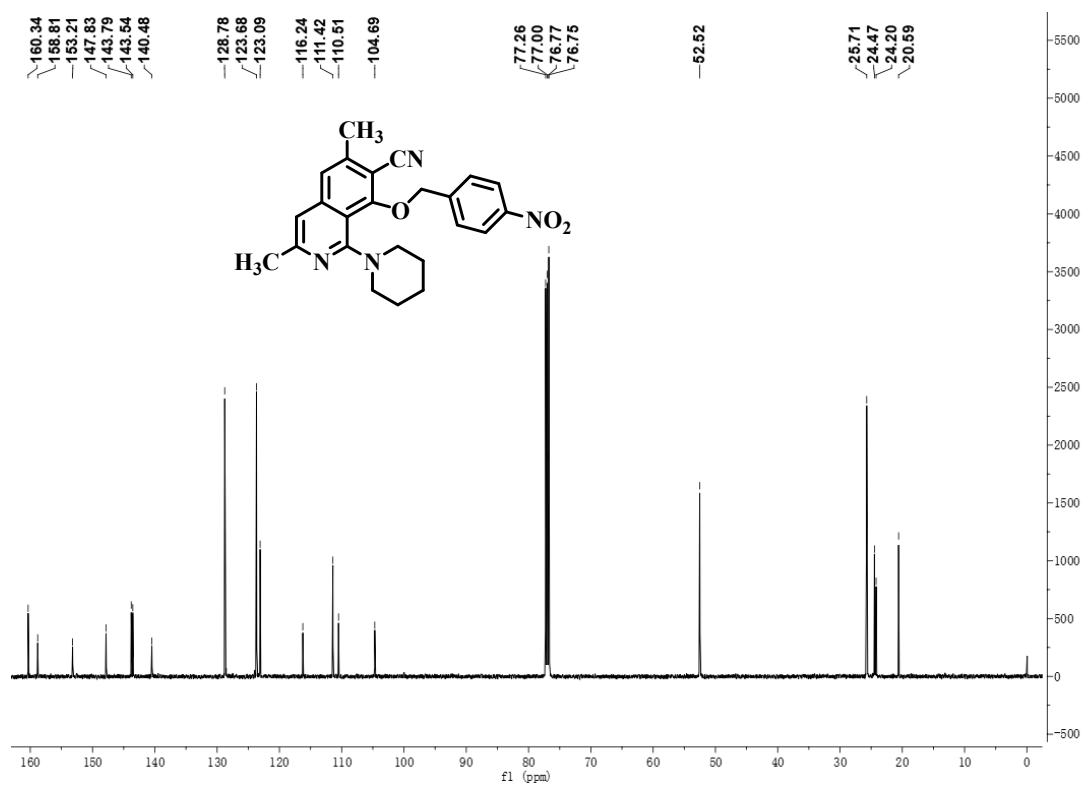

Fig. S31 <sup>13</sup>C NMR of IQ-NO<sub>2</sub> (CDCl<sub>3</sub>, 125 MHz).

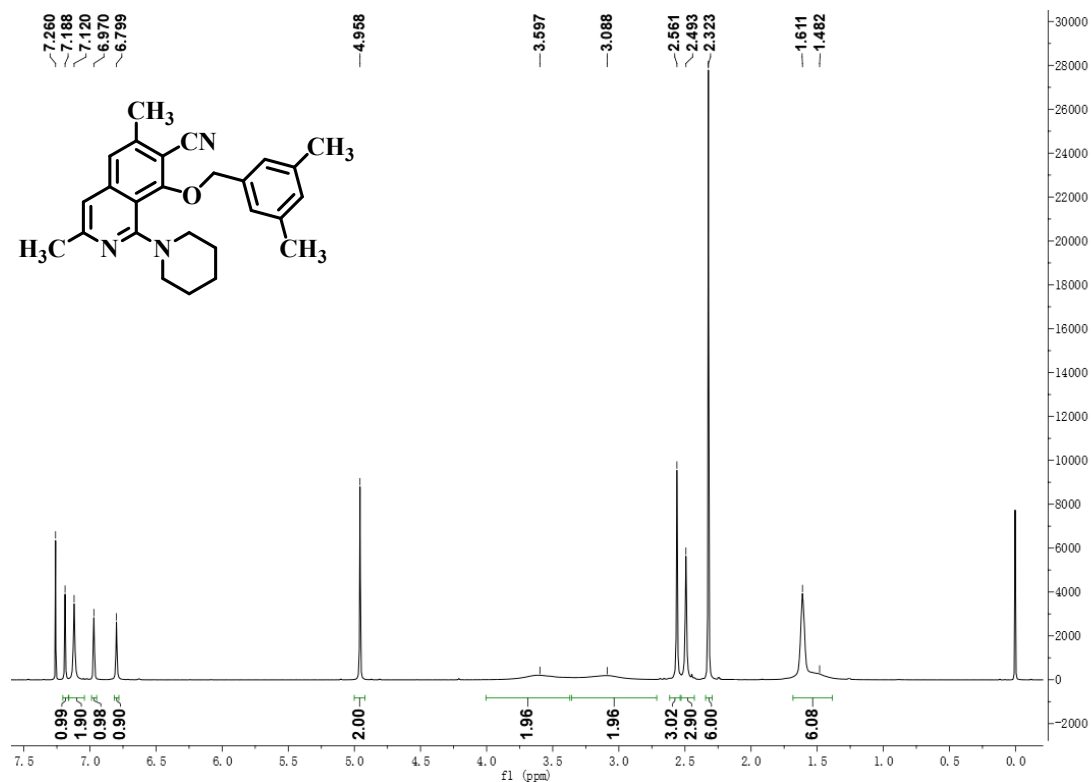

Fig. S32  $^1\text{H}$  NMR of IQ-DMe ( $\text{CDCl}_3$ , 500 MHz).

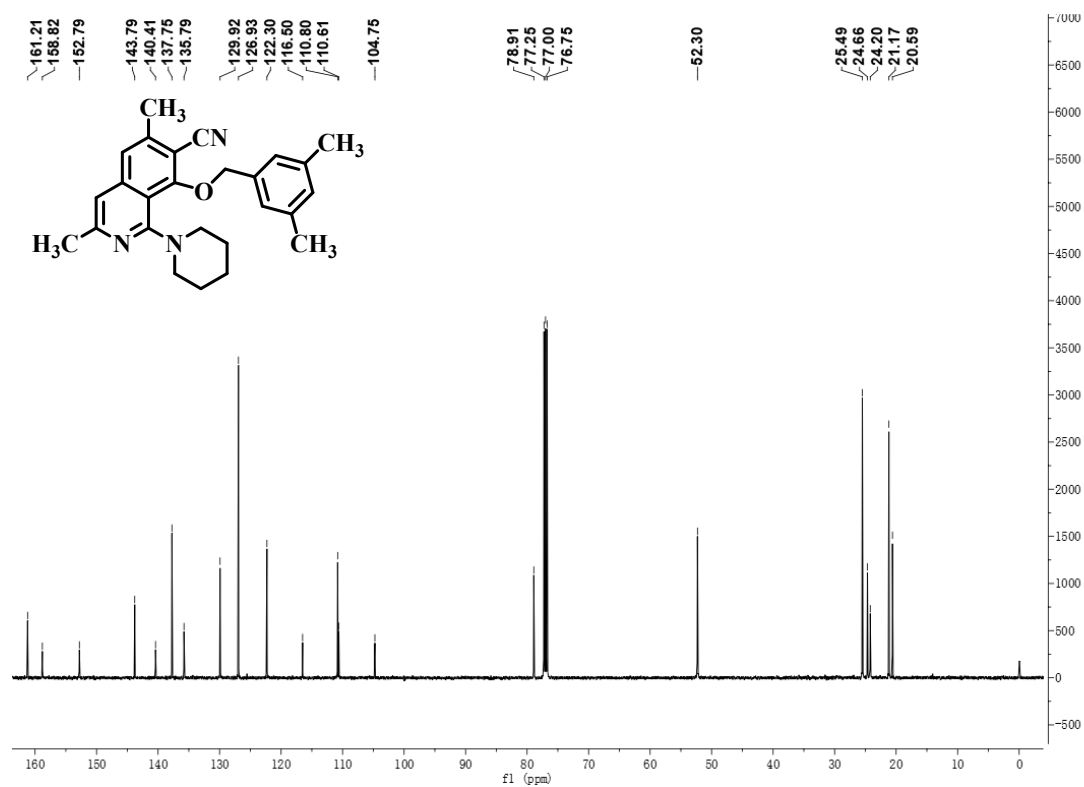

Fig. S33  $^{13}\text{C}$  NMR of IQ-DMe ( $\text{CDCl}_3$ , 125 MHz).

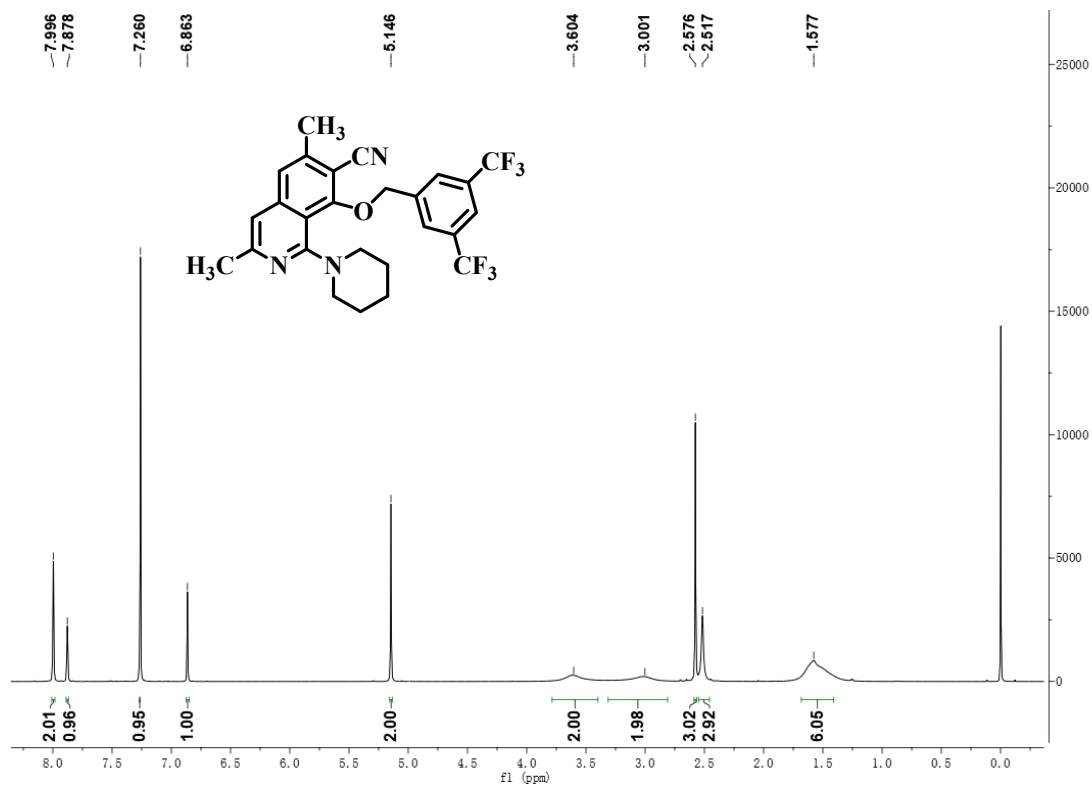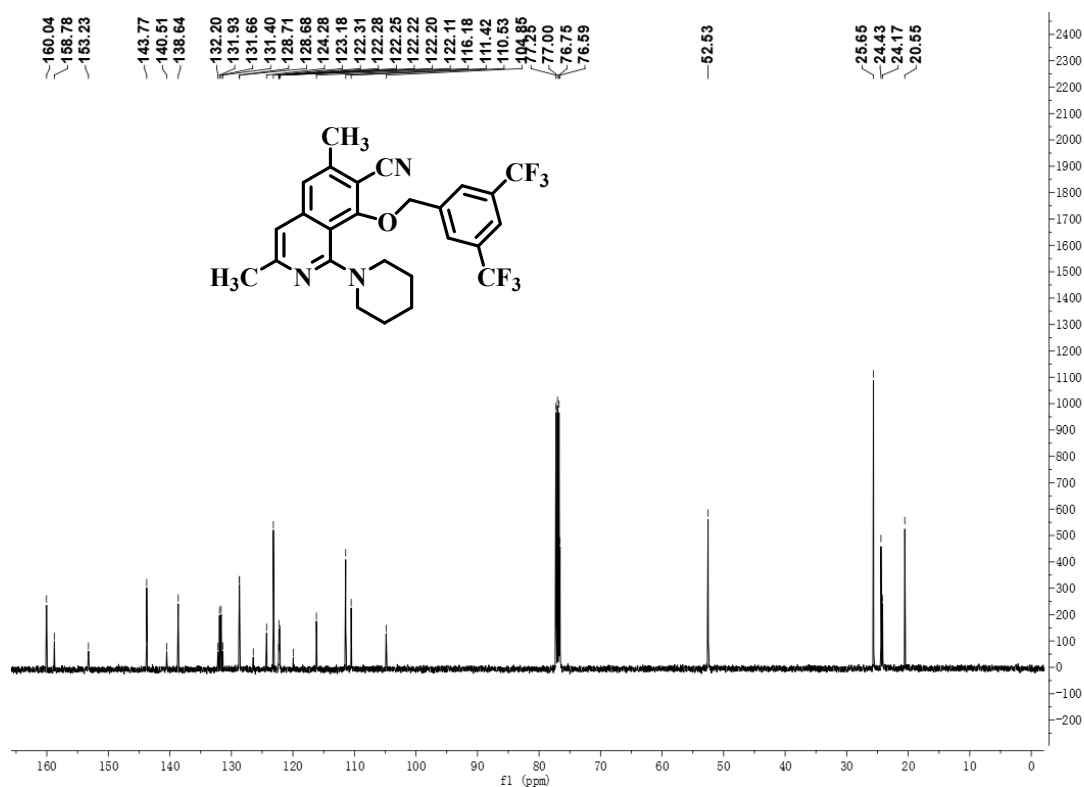

Supplement: d3ce00231d1.pdf [file d3ce00231d1.pdf]
